# Supplementary material for: Incipient Balancing Selection through Adaptive Loss of Aquaporins in Natural Saccharomyces cerevisiae Populations
Source: PLoS Genet. 2010 Apr 1;6(4):e1000893. doi: 10.1371/journal.pgen.1000893 (PMC2848549; doi:10.1371/journal.pgen.1000893)
Supplement: Table S7 — Peak areas identified in AQY2 scan. Each column shows the chromosome, start position of peak, length of identified peak, maximum difference in between-group variation minus within-group variation, and area under the difference curve. (0.19 MB XLS) [file pgen.1000893.s012.xls]

chromosome	position	Lenght	MaxValue	Area
chr01	3700	1400	27.16851985	25293.45134
chr01	5500	600	3.913333333	2421.069841
chr01	6200	500	4.619831139	2269.177587
chr01	7000	600	4.907825593	2486.404564
chr01	7700	800	7.746693122	5029.589663
chr01	8900	1900	5.705385996	9035.755577
chr01	13200	1300	10.85921701	8563.760447
chr01	18000	1100	10.25619835	8751.621736
chr01	19200	300	14.5	3504.292929
chr01	21300	1300	12.5	10872.24783
chr01	24800	7200	13.33954116	36087.9728
chr01	36900	700	24	10797.47475
chr01	37700	2800	33.13186813	50770.43752
chr01	40900	2600	31.79453458	34189.1405
chr01	43600	1200	10.21575521	9213.156569
chr01	46400	200	3.300947383	926.9808736
chr01	46800	700	4.733333333	2951.119349
chr01	47600	200	3.947326978	1073.59841
chr01	49300	200	3.222910217	876.491494
chr01	49600	500	5.575623375	2814.469492
chr01	51300	500	4.953803556	2162.18581
chr01	53900	300	3.31420373	1203.322473
chr01	55600	800	4.718503937	3762.682662
chr01	57400	1200	6.376421383	6389.368941
chr01	63600	1100	5.080895009	5154.820972
chr01	65100	1500	8.341292377	9997.701382
chr01	66700	200	4.254763	1043.832627
chr01	68000	800	3.867215041	2160.526019
chr01	70100	200	3.473262032	910.5904322
chr01	70900	1000	4.316209242	4074.862965
chr01	73500	1100	4.710216998	4991.984095
chr01	75500	1800	5.958468446	7958.856088
chr01	78200	500	3.457804591	1949.867277
chr01	80700	700	7.712996778	4070.42941
chr01	85200	300	3.526652174	1318.109142
chr01	87000	900	4.477410213	3728.315312
chr01	88300	500	3.670349538	2002.087452
chr01	90800	1300	5.125740509	3983.884265
chr01	93300	500	3.746268943	2107.248108
chr01	97300	700	4.868593772	3171.931782
chr01	98200	1200	4.735903994	5235.843202
chr01	100200	1300	6.72301809	7326.606247
chr01	102400	2300	9.281433949	13813.26498
chr01	105700	1300	10.00158796	10311.73205
chr01	112300	1100	5.58757764	5012.357478
chr01	114000	1100	5.03891491	4805.356029
chr01	115200	400	4.611237661	1848.560369
chr01	120700	1000	5.377894737	4314.548144
chr01	125000	300	4.041501976	1352.68257
chr01	125700	300	4.447487817	1272.876252
chr01	126400	400	4.114987639	1699.603604
chr01	126900	600	5.42985843	2772.366595
chr01	130100	400	4.363984674	1831.772857
chr01	132200	300	3.816330177	1244.148837
chr01	133100	1000	6.671878016	4349.618408
chr01	136300	1200	10.58823529	7707.357295
chr01	138800	300	4.983766234	1414.880862
chr01	139200	400	5.758490566	1877.088359
chr01	142200	700	5.056730446	2635.295447
chr01	148400	200	3.277167277	913.3688327
chr01	165600	1000	5.924555142	5290.164157
chr01	171600	200	3.564479749	671.6982201
chr01	173500	300	3.635384615	1185.870563
chr01	181600	200	4.648809524	344.3802521
chr01	185600	500	4.060987093	2188.114116
chr01	187800	1200	4.803598201	4810.208856
chr01	194500	1600	4.721984695	6551.462255
chr01	196800	200	3.692721337	918.127733
chr01	197200	600	4.507245768	2634.617052
chr01	200600	8600	15.75461922	54518.88295
chr01	224400	1200	8.234470046	7542.504763
chr01	227200	300	10.2585034	1348.871293
chr01	228900	1400	18.05287897	9887.789069
chr01	236300	200	3.75316942	914.1432563
chr01	243400	900	5.574993691	4281.01982
chr01	249600	1200	12.81825149	12480.69178
chr01	256900	1300	25.26873385	18274.31671
chr01	260900	200	3.64638847	982.9022653
chr01	266200	300	13.25714286	2321.733094
chr01	268200	1800	15.10695187	17497.07117
chr01	273100	200	5.169828038	994.4541528
chr01	279700	-279700	26.675	-1070327.554
chr02	9500	400	6.78968254	1416.900463
chr02	10100	500	2.831460674	942.9938122
chr02	13500	900	2.559648613	1547.84181
chr02	18700	200	1.247246022	359.0724683
chr02	29900	200	1.400308569	350.6525472
chr02	56300	200	1.956521739	355.6329069
chr02	56600	200	1.887980769	389.0973486
chr02	59100	200	1.959524381	288.7267608
chr02	59400	700	2.776753425	1411.234527
chr02	60200	200	1.247329629	337.0485158
chr02	62000	300	1.644261941	501.3213617
chr02	62400	500	2.490260246	1020.54528
chr02	63600	1800	2.95707164	3640.990174
chr02	65700	1900	6.891752577	7228.366345
chr02	69000	1500	4.335897436	4373.454223
chr02	70600	300	1.402776041	435.9558825
chr02	71600	700	2.10273794	1060.043627
chr02	75000	1200	5.416666667	5246.935153
chr02	76700	1800	4.587281106	4591.756717
chr02	78600	900	3.301204819	1907.521957
chr02	79600	300	1.825551783	553.1577372
chr02	81100	400	1.359502488	559.1621331
chr02	81700	400	1.951600312	666.2602663
chr02	82200	300	2.386763022	615.1895629
chr02	82600	200	1.256534954	312.7320114
chr02	83000	200	1.270851754	289.2688416
chr02	83400	200	1.406818182	165.3526272
chr02	85500	400	2.22934153	774.8935743
chr02	86300	200	1.462450593	329.2431459
chr02	86600	200	1.296428571	266.0036575
chr02	87700	700	3.614973262	1762.894465
chr02	89700	1300	3.652941176	2966.6155
chr02	91700	200	1.900584795	271.9112487
chr02	93200	300	1.72990298	572.0000642
chr02	95100	1500	3.940478833	3512.332537
chr02	97800	1000	1.848526646	1623.168574
chr02	98900	1300	3.40566403	3260.221178
chr02	100700	1100	2.750172198	2765.953365
chr02	102000	2300	3.579691802	4913.260665
chr02	104500	1100	3.48044909	2436.711804
chr02	108000	500	2.156330503	907.1492575
chr02	108600	200	4.745991561	701.2138027
chr02	110800	300	2.376680021	591.9247659
chr02	111200	900	2.426425753	1891.038142
chr02	113200	1500	4.329232167	3622.106579
chr02	115300	1200	3.558212058	3344.944902
chr02	116600	1900	8.191468254	7519.486673
chr02	118600	500	3.300132802	1355.0928
chr02	119300	400	1.380315448	619.4168126
chr02	120000	1000	2.314524556	1832.321856
chr02	122900	800	2.866396761	1748.734995
chr02	123800	200	1.363414237	354.8334666
chr02	124200	1400	2.109614782	2495.05618
chr02	125800	1400	4.367170626	4567.904067
chr02	127300	200	1.593938559	432.1320255
chr02	128700	800	2.90255679	2030.630033
chr02	129600	200	1.754219728	375.6996591
chr02	130400	1000	2.853641985	2076.311671
chr02	132600	200	1.337837838	304.5348097
chr02	134000	1000	2.112967856	1709.100405
chr02	135300	1600	1.97917253	2740.632855
chr02	137000	200	1.321693584	354.8235082
chr02	137900	1100	1.941747573	2022.517619
chr02	139100	900	3.01891634	2234.459713
chr02	141000	1500	4.028571429	3994.538685
chr02	143200	500	2.086770692	914.3621696
chr02	144100	1100	2.818909091	2578.638794
chr02	145500	900	2.778957622	2061.75192
chr02	148200	500	2.182863715	953.1607425
chr02	148800	200	1.677609673	500.7224409
chr02	150200	1100	3.253725712	2766.06927
chr02	151800	800	3.81322314	2428.367011
chr02	154600	300	1.959789057	510.7192632
chr02	155000	1900	2.735982814	3797.158341
chr02	157000	1100	2.597674419	2060.75342
chr02	158400	800	3.233629776	1771.692125
chr02	160800	600	1.921412804	967.0827538
chr02	164600	400	1.549273086	618.4412673
chr02	165100	200	1.508632138	415.4399214
chr02	165800	300	1.610860439	525.1407206
chr02	166200	200	1.423023075	411.9908789
chr02	166500	800	1.946127527	1405.267855
chr02	167400	400	1.439833633	644.9363293
chr02	167900	300	1.318534639	500.1196465
chr02	168500	4700	4.611857575	12338.35884
chr02	176000	300	1.908063795	599.9464086
chr02	177200	200	1.471378092	313.0913292
chr02	177900	1200	5.870665105	5034.827459
chr02	179700	1900	4.031535665	5031.223153
chr02	181900	700	2.348271267	1187.522683
chr02	187100	1100	3.290267011	2285.569264
chr02	190000	900	1.963795017	1369.905593
chr02	191500	1100	3.699266203	2825.716523
chr02	192700	1100	4.548006785	3638.385501
chr02	194700	300	1.576445614	419.846513
chr02	195100	700	2.623541954	1022.910791
chr02	197500	1000	4.343242011	2679.547273
chr02	199800	1000	1.893995966	1568.302418
chr02	201200	300	1.483566691	500.5196942
chr02	201600	200	1.297451774	376.0549635
chr02	202100	1200	2.192036879	1863.612718
chr02	203500	2500	2.253174603	3638.545007
chr02	206600	2600	9.434576803	12558.72861
chr02	210200	800	3.041441441	1830.151903
chr02	212100	600	2.202222222	1172.633162
chr02	212800	400	1.722181034	512.9156289
chr02	214700	700	2.058610709	1238.858016
chr02	215500	300	1.613863996	577.1003929
chr02	217500	200	1.263406203	310.7905599
chr02	218700	300	1.631542935	464.4197659
chr02	219300	200	1.258034894	351.7444289
chr02	219600	200	1.386813187	275.7373338
chr02	219900	300	1.512605042	478.0824401
chr02	221800	1100	3.811148087	3304.80461
chr02	227900	200	1.268881506	345.7124862
chr02	228200	1500	3.375212224	3717.823812
chr02	230600	6000	5.977375566	21498.38545
chr02	242800	900	1.610169492	1358.302737
chr02	246100	800	2.725381415	1473.523757
chr02	247300	900	3.385382436	2291.80065
chr02	249100	1100	3.804215054	3359.957446
chr02	251200	200	1.353467724	365.4410401
chr02	251900	1500	3.405975853	3705.077406
chr02	253600	300	1.402662994	475.9670494
chr02	255200	300	1.467005076	454.1332113
chr02	257500	3600	4.55515873	10804.84641
chr02	261200	1100	3.016396779	2214.55581
chr02	263200	1600	8.216883117	8010.090901
chr02	265400	1100	3.077601338	2810.075133
chr02	266700	1200	2.114195456	2058.076024
chr02	268000	300	1.524446443	395.9627802
chr02	269600	200	1.495762712	392.4120455
chr02	270100	200	1.310077972	295.955129
chr02	270700	300	1.301044876	393.1892685
chr02	271200	400	1.933333333	683.8410533
chr02	280400	2100	9.17163133	11866.98089
chr02	282600	400	1.372540945	602.4122885
chr02	286100	1600	8.702745098	8057.219222
chr02	288400	200	1.542108546	366.0574758
chr02	288700	800	2.164574236	1525.808781
chr02	289600	400	2.373198578	641.3176695
chr02	292000	1100	4.054559702	3075.762714
chr02	295900	2900	3.374650699	6338.616246
chr02	298900	300	1.585365854	522.7315481
chr02	299500	1200	4.011424944	3827.954111
chr02	300800	2100	7.60839606	7558.640678
chr02	304100	400	1.562616128	655.9750643
chr02	304800	2400	7.526073063	9576.681418
chr02	308200	600	2.145058401	1100.87334
chr02	308900	300	1.559810357	597.4260946
chr02	311000	300	1.529374376	519.8335456
chr02	311700	200	1.24643055	292.8982663
chr02	313600	400	1.527037759	692.1171172
chr02	319000	400	1.251644737	464.4306935
chr02	319700	1700	6.03211341	6489.544871
chr02	321700	400	2.219543147	814.6886053
chr02	322200	400	2.811942959	952.0386591
chr02	322800	200	1.315639756	289.1722198
chr02	323100	1400	4.868886819	4221.210255
chr02	326400	300	2.668032787	527.5070871
chr02	326800	500	2.14	912.6314418
chr02	328100	1400	3.220902017	3326.100476
chr02	329600	500	2.25	1099.347158
chr02	330300	700	2.517445299	1350.341008
chr02	331100	200	1.294776119	340.0478684
chr02	332500	2500	3.882958801	6320.040282
chr02	335200	800	2.63333863	1695.100002
chr02	337000	700	2.505747126	1357.263898
chr02	337900	200	1.263315579	347.2014099
chr02	338900	1700	6.387571381	6508.051229
chr02	340900	200	1.303058533	359.6718857
chr02	342100	1100	3.127564103	2490.975618
chr02	344400	400	2.198700374	801.5978789
chr02	344900	300	2.579814672	815.8387566
chr02	345300	1300	7.230106986	6634.323499
chr02	346800	400	1.374814815	648.2803246
chr02	350200	200	1.357060069	338.0941995
chr02	350900	200	1.332625995	358.5108378
chr02	351600	1100	2.796899225	2150.077759
chr02	353200	300	1.508506346	541.319149
chr02	353600	1700	4.897448097	4409.994362
chr02	358200	900	2.408301158	1748.465052
chr02	359700	200	1.358519313	349.5849132
chr02	360000	600	2.507311611	1235.089122
chr02	361800	200	1.294324743	308.4684007
chr02	362100	1300	5.116815086	4521.178213
chr02	363700	1100	6.069498069	5344.906867
chr02	366900	200	1.646713615	260.0503927
chr02	367200	200	1.502080065	419.7872855
chr02	368400	2200	4.016607439	5473.716324
chr02	370800	1000	2.55636553	2076.844815
chr02	372700	800	2.219273302	1469.74606
chr02	374400	2500	4.08620549	6597.201352
chr02	377400	600	3.758489398	1580.995647
chr02	378400	2100	2.829976985	4343.333417
chr02	380600	2100	4.463007546	6729.672992
chr02	384300	2200	3.648120301	6003.364667
chr02	386600	300	1.379278935	495.36695
chr02	387000	1100	2.644331742	2294.005543
chr02	389000	200	1.317735494	363.593894
chr02	389300	1900	6.489955022	7402.081588
chr02	391300	1200	4.582811848	3334.9049
chr02	395600	900	2.677014043	1763.044452
chr02	396600	200	1.418764814	372.3992341
chr02	399400	300	1.595925297	276.9488692
chr02	400900	400	1.422222222	624.9937964
chr02	404200	800	2.166726297	1462.91798
chr02	408800	1100	2.994105206	2450.545071
chr02	424300	600	1.738551071	1070.953465
chr02	431200	200	1.496891693	397.8924753
chr02	434600	700	1.392857143	989.7522056
chr02	436600	1300	6.769692696	5881.502441
chr02	440300	500	1.552821128	841.479852
chr02	440900	300	1.644716813	559.9011969
chr02	441300	200	1.463098404	351.364388
chr02	442100	200	1.261480416	239.6028396
chr02	443800	200	1.33877417	380.4886702
chr02	445000	700	2.622180451	1336.695282
chr02	446500	2100	4.747784431	7315.481315
chr02	449200	1200	6.329304185	3544.114859
chr02	451300	1400	5.504390662	5278.548906
chr02	453100	600	1.450043066	922.4545239
chr02	454200	1200	3.087732749	2981.500004
chr02	456800	200	1.617083056	356.7640115
chr02	457100	800	2.65135293	1522.359819
chr02	460500	1100	4.886227545	3516.36866
chr02	462900	2500	6.842473118	9884.935974
chr02	467300	300	1.913030775	569.3031416
chr02	467700	600	2.193126023	1145.062575
chr02	470100	1300	3.299365185	2984.684815
chr02	472700	1500	7.085043988	7256.596321
chr02	475400	2200	7.350396331	9783.443218
chr02	478000	200	1.290067114	254.1336994
chr02	479900	1100	5.498692117	4747.774819
chr02	481200	3400	6.98611998	11663.98792
chr02	485200	1600	5.174352363	5554.739161
chr02	486900	1800	4.364143574	4293.454303
chr02	489000	1700	4.128367143	4867.905118
chr02	491200	200	1.542591267	381.4419645
chr02	491500	200	2.042553191	424.7606383
chr02	493300	800	1.82478355	1401.266035
chr02	494200	200	2.569014085	553.6834119
chr02	494500	900	2.959949142	1403.318596
chr02	496200	1100	2.633371714	2050.38469
chr02	497400	1200	3.191094905	2764.387636
chr02	499900	1200	5.139829015	3775.143562
chr02	501900	400	1.433583298	584.4772468
chr02	502400	600	1.533380407	961.5584815
chr02	505600	200	1.598849129	377.618002
chr02	505900	800	2.830852391	1787.849755
chr02	509100	500	1.648580586	804.9944304
chr02	509900	2000	4.026666667	4107.816976
chr02	514100	1100	4.781759693	3146.718185
chr02	519900	1700	5.823861981	5170.486562
chr02	521700	300	1.748639287	596.2698909
chr02	522100	500	3.168608319	1287.869996
chr02	522900	300	1.503133568	425.0425139
chr02	523500	500	2.922841083	1109.777288
chr02	524500	300	1.335365854	422.87177
chr02	525400	200	1.725	377.8188778
chr02	525700	200	1.583726415	330.7213554
chr02	526100	700	4.837424496	2338.468608
chr02	526900	400	1.755376344	526.1886464
chr02	528300	2000	4.652941176	5114.293619
chr02	530400	200	1.324675325	322.8182124
chr02	534600	300	1.427848101	488.5035107
chr02	535900	400	1.640566038	648.6266695
chr02	537800	1400	5.090509607	4876.312809
chr02	542000	1500	4.461038961	4320.08363
chr02	543600	700	2.471729958	1545.721159
chr02	544400	200	1.27706422	296.1677838
chr02	546800	500	1.854706619	949.741213
chr02	549100	300	1.632477216	547.6403914
chr02	549500	200	1.303784885	376.3693864
chr02	549800	300	1.374655475	516.0705897
chr02	550200	2000	2.845096077	4139.493743
chr02	553600	400	5.571045576	950.6876026
chr02	554400	300	1.472676115	383.2279958
chr02	557800	3000	7.426614481	13516.25553
chr02	564100	600	1.428420193	886.8389828
chr02	565300	200	1.264775765	332.1283449
chr02	565600	1100	10.15101416	6191.730599
chr02	567500	200	1.959615952	437.2475851
chr02	567800	800	2.031135149	1196.72396
chr02	568700	1300	5.474085366	4545.34627
chr02	570200	700	3.140446559	1763.215712
chr02	571000	300	1.647965507	489.3160191
chr02	573700	1800	3.991593338	4763.888313
chr02	577400	200	1.3811934	309.6254435
chr02	578200	200	1.274761033	375.0093436
chr02	578700	200	1.530122063	381.299088
chr02	579300	2200	5.260049667	6579.820166
chr02	581800	200	1.25846335	353.498299
chr02	582100	400	1.532218914	628.3669553
chr02	583500	600	2.597222222	1070.47795
chr02	585800	300	1.715588487	500.788003
chr02	587200	2400	7.853593504	9018.943518
chr02	589700	1300	5.57691943	3673.212932
chr02	591300	1600	3.302380952	3707.749912
chr02	593000	1100	3.06880531	2850.391129
chr02	595300	1400	3.387441277	3401.773376
chr02	597100	200	1.30421667	323.2741668
chr02	597500	500	2.4526159	1042.319046
chr02	598200	400	2.080383509	771.3046537
chr02	598900	500	2.012123391	781.5096076
chr02	599500	400	2.110420143	674.4515172
chr02	600600	700	4.31547619	1906.67177
chr02	602300	200	1.397179788	380.3265145
chr02	604400	1300	2.659456608	2679.943923
chr02	606300	1100	2.053112314	1887.225279
chr02	608200	1200	3.278579725	2416.752433
chr02	609800	700	3.112382696	1545.557605
chr02	610800	1700	2.844436502	3397.146293
chr02	612800	700	2.268160829	1494.166747
chr02	613700	200	1.656920511	343.9241526
chr02	615200	300	2.400739039	679.4650699
chr02	615800	1100	2.914371809	2452.875786
chr02	617000	2100	6.05547167	7753.597224
chr02	619300	300	1.280001687	448.2494598
chr02	620600	200	1.433342537	342.6905131
chr02	621000	200	1.283711123	354.3350393
chr02	621300	400	2.132928929	910.5152689
chr02	621800	500	3.039947474	1135.014529
chr02	625100	400	1.938175461	710.9403801
chr02	627700	900	2.991017398	2070.414059
chr02	629000	1100	4.348779558	3846.083555
chr02	636200	2800	4.783333333	6254.007787
chr02	640200	400	1.923073266	658.0061577
chr02	640700	2500	5.226565299	7290.590977
chr02	644000	1400	4.447784046	3936.777924
chr02	645500	200	1.582490408	407.1369584
chr02	645800	1400	3.239130435	3031.028663
chr02	648400	400	1.367341783	607.159766
chr02	649000	3800	4.747368137	10289.07823
chr02	653800	600	2.198714015	1203.692439
chr02	655500	1400	3.96839152	4033.419597
chr02	657000	400	3.605870572	1212.554014
chr02	658300	1100	4.681906826	3198.258439
chr02	661600	900	2.407101876	1740.977746
chr02	662800	300	1.415372671	494.9101691
chr02	663400	200	1.27237419	363.9684442
chr02	693000	200	1.441647597	350.1634837
chr02	701800	200	1.249769585	219.6173414
chr02	711200	200	1.555725776	400.1868233
chr02	718500	600	1.969771863	1028.983414
chr02	734700	200	1.772970562	201.0079901
chr02	736500	200	1.511278195	305.5956986
chr02	738300	200	1.520746542	386.8575586
chr02	738600	500	1.601873878	794.8833082
chr02	750500	1100	3.140334129	2435.576059
chr02	762100	900	2.844532279	1834.20436
chr02	768800	200	1.335280189	349.00478
chr02	773700	200	1.380584305	365.6683086
chr02	778500	500	1.913229018	837.9782662
chr02	779900	400	2.141450925	828.159889
chr02	783600	200	1.354534647	310.8369637
chr02	784000	200	1.295477137	303.37708
chr02	786800	2800	4.831132075	7574.402516
chr02	790100	1100	2.327116212	2031.596332
chr02	796400	200	1.605172414	228.1973056
chr02	802200	500	1.728273499	871.8620157
chr02	810100	300	1.498536585	523.0358423
chr02	813400	500	1.500411459	798.6563483
chr02	817800	300	1.398151205	447.6308221
chr02	819700	1000	2.34029484	1917.409285
chr02	821800	200	1.328784119	359.0467641
chr02	830700	300	1.603323725	498.8693736
chr02	837200	2900	28.3773849	44976.74636
chr02	840800	1300	8.089538972	5620.630653
chr02	842200	200	1.73729328	235.9032748
chr02	843000	1300	5.356393582	2893.396337
chr02	845300	200	1.274581861	349.1922001
chr02	845600	700	3.105374291	1589.037043
chr02	847400	200	1.636889992	222.7963853
chr03	8700	1900	2.698804961	1869.64322
chr03	11300	2200	14.62247671	13963.19402
chr03	13600	200	0.502912621	90.09602535
chr03	13900	1000	0.591781103	418.484371
chr03	17400	1000	0.756132828	429.9010097
chr03	18500	500	0.871526085	156.6195861
chr03	20700	700	0.279466152	77.54118174
chr03	21800	300	0.104895105	-45.29587536
chr03	24100	500	0.502540717	57.82272774
chr03	26500	200	0.115668059	-12.25664801
chr03	27200	200	0.223806366	-10.28426739
chr03	27700	300	0.985754986	73.77616747
chr03	28100	400	0.651180503	67.02457562
chr03	29400	1200	1.992733323	883.3445665
chr03	30700	200	0.05971881	-75.76875855
chr03	32700	300	0.123977695	-72.68176511
chr03	33200	200	0.041881443	-23.61374549
chr03	35500	1400	1.699675325	1499.310553
chr03	38200	2900	1.98436875	3270.512745
chr03	42800	300	0.332305408	16.9505399
chr03	43400	200	0.251687113	-5.696223601
chr03	45100	3700	1.4054392	2440.270919
chr03	49000	1100	1.248165848	672.242666
chr03	51100	400	1.048387097	124.9619751
chr03	54700	400	0.204051657	51.18224663
chr03	56000	900	0.69124424	267.7785105
chr03	58000	300	0.381386861	-2.671910606
chr03	58700	1600	1.523809524	1415.925147
chr03	61400	200	0.001715612	-51.20768689
chr03	62700	1400	0.9681328	604.2254642
chr03	65000	200	0.016761449	-30.93932349
chr03	65300	500	0.485758725	161.1014153
chr03	68600	700	0.947310243	233.0411085
chr03	69800	1200	1.364791512	1082.85402
chr03	71100	1700	1.106561822	1162.556617
chr03	73800	300	0.536440678	45.9110157
chr03	75100	200	0.379899497	-41.03356051
chr03	75600	2000	4.003709986	4468.527378
chr03	79900	200	0.01732852	-31.14444859
chr03	80200	200	0.653501382	60.32245021
chr03	81400	2900	1.795366795	2248.137392
chr03	84800	1100	4.023684211	2193.659459
chr03	88700	2600	0.520833333	-858.8809524
chr03	91400	10100	13.49673203	39512.42569
chr03	103200	1300	1.240177089	1074.510479
chr03	107900	600	0.341340076	58.3803026
chr03	108700	400	0.843434343	82.22790811
chr03	112000	1900	1.58822482	1463.74254
chr03	115500	200	0.040322581	-51.62292979
chr03	119700	1400	0.741501976	541.2391424
chr03	121300	200	0.230820106	27.41419641
chr03	121700	400	0.179770366	6.251917034
chr03	122500	200	0.085978836	-40.3064662
chr03	125100	900	1.395725278	858.7209444
chr03	128800	200	0.078244779	-8.525177056
chr03	129100	300	0.325844873	6.248391763
chr03	130700	200	0.063540091	-13.22859452
chr03	131000	1800	1.064496685	596.3207696
chr03	133100	200	0.037597173	-23.2379522
chr03	133600	300	0.261176471	60.68674521
chr03	134300	1200	0.763466042	382.8462404
chr03	136300	2800	1.117235457	1642.787641
chr03	139900	2400	0.947163629	1212.251121
chr03	143500	2400	0.87219888	1201.19238
chr03	147400	900	0.935483871	370.2863366
chr03	148400	700	0.103565365	2.761554684
chr03	149300	700	0.096172207	43.17988495
chr03	150100	200	0.234500114	51.16263948
chr03	150900	200	0.254116514	16.44795229
chr03	151200	1000	0.68122585	376.5707477
chr03	152500	1100	0.618174598	201.5514452
chr03	153700	500	0.421006178	-9.0312872
chr03	155300	1600	1.38726666	1177.885788
chr03	157100	200	0.08953971	-19.45352937
chr03	157400	200	0.003706999	-35.29899126
chr03	157900	300	0.019435976	-16.4707589
chr03	158700	200	0.136363636	6.44881714
chr03	160100	200	0.078651685	-114.857977
chr03	167300	200	0.5625	60.56547619
chr03	167900	1100	0.912285105	695.5388307
chr03	184000	600	1.193181818	238.987271
chr03	185600	300	0.351383206	-58.16429113
chr03	187100	1000	0.7281528	342.6838249
chr03	188300	3200	1.22457327	2610.384264
chr03	194800	300	0.554704422	69.03312905
chr03	195200	300	0.386052077	63.92531239
chr03	195700	3300	4.404797601	5224.28469
chr03	199100	7400	6.588763748	19115.33644
chr03	206600	1100	0.933467007	725.6006366
chr03	211500	7200	6.195138889	17905.46223
chr03	218800	2000	5.720064632	5136.379642
chr03	220900	2200	2.045102041	2534.695437
chr03	223200	17200	5.468783069	41708.82268
chr03	241000	300	0.547951731	68.60241711
chr03	241400	4500	11.0915996	17965.50672
chr03	246300	4500	8.458064516	16415.42397
chr03	251000	10800	4.579330161	23467.326
chr03	261900	600	0.512400063	70.78576507
chr03	262600	8100	10.43797873	18055.59237
chr03	273200	400	1.25	216.4908361
chr03	273700	200	0.199643494	-71.09507201
chr03	275000	1200	7.80075188	3986.163533
chr03	278700	300	0.365467089	23.04203275
chr03	280400	300	0.851560178	38.16294687
chr03	281600	1200	1.872223398	1164.635546
chr03	284500	600	0.36305633	50.77168948
chr03	286400	200	0.082726204	-78.12161853
chr03	289200	1100	1.325757576	568.646998
chr03	291100	300	0.549473684	62.61252895
chr03	291500	200	0.22533532	-39.32287974
chr03	292100	200	0.005403	-9.989757942
chr03	292400	1000	1.029951506	534.8335675
chr03	293700	300	0.094781753	-2.837583637
chr03	295000	300	0.12710084	-54.3201062
chr03	295800	300	0.203285421	-46.78160036
chr03	299500	1200	1.917928784	1479.18207
chr03	300800	200	0.203068592	26.07392952
chr03	301300	500	0.867321546	255.8418304
chr03	301900	400	0.488888889	85.62358359
chr03	303000	2700	1.69505019	2003.176033
chr03	305800	700	1.205947137	257.0967207
chr03	306700	200	0.039097744	-79.8012788
chr03	307300	500	0.43880597	34.80254555
chr03	312700	400	1	170.325191
chr03	314000	300	0.329059829	5.599572867
chr03	314400	400	0.239778177	-35.17403208
chr03	315200	3400	5.125837721	8228.444396
chr03	319300	400	0.646167048	134.4382399
chr03	319800	400	0.13397642	-10.12101905
chr03	320300	1000	0.958399157	646.0417645
chr03	323600	1000	0.404846336	131.9382606
chr03	324700	1100	0.479874308	140.5203687
chr03	328300	800	1.083800892	289.2498578
chr03	330600	400	0.549539171	105.5397735
chr03	331100	1300	1.35905714	652.9114941
chr03	333900	700	2.213664596	537.3573069
chr03	335600	1400	2.783932212	2019.126057
chr03	337300	900	0.897709924	237.7013668
chr03	339100	200	0.160392799	8.03838271
chr03	343700	1600	0.595469256	575.5110294
chr03	347300	1600	3.957442782	3430.744514
chr03	349000	2900	6.105320238	8872.084796
chr03	354000	2000	6.162418265	4830.217164
chr03	358000	900	4.957080242	1860.403925
chr03	359700	1000	2.180695355	667.682528
chr03	362100	400	6.009966777	1384.082774
chr03	365200	1100	18.48532771	16088.82299
chr03	366600	1100	2.685814186	959.64549
chr03	369300	200	0.261363636	-142.681479
chr04	3500	400	14.76232394	1559.655118
chr04	17400	600	4.457352941	1572.980006
chr04	22100	1400	8.399666669	7117.005072
chr04	24100	200	1.265741976	272.6814386
chr04	27500	200	1.029366861	273.0653121
chr04	30900	900	1.961061947	1341.838584
chr04	33500	1100	1.620100858	1520.505984
chr04	35400	200	1.063850688	250.4175318
chr04	40300	600	1.484785615	809.3061615
chr04	43200	500	1.741122566	741.292472
chr04	49900	1100	1.604501608	1605.456495
chr04	51200	300	1.015251365	322.3528367
chr04	58000	400	1.583706436	621.5463914
chr04	58500	200	1.347619048	359.8163295
chr04	58800	200	1.071747535	297.7553283
chr04	59600	200	1.308701657	316.7342314
chr04	59900	200	1.309090909	287.7927906
chr04	63100	400	1.414452214	589.7223692
chr04	63600	300	1.237241379	333.8615218
chr04	68200	400	1.175990099	519.3669293
chr04	68700	400	1.629060579	513.6007735
chr04	71400	200	1.307576285	252.9547985
chr04	71700	200	1.477283012	316.3375317
chr04	72800	200	1.248330684	269.1015562
chr04	75500	500	1.945511573	803.4535682
chr04	76200	1100	1.980071769	1839.370922
chr04	90300	700	1.871856769	953.8624628
chr04	111100	200	1.028395785	293.208571
chr04	111400	700	1.694813978	1132.187095
chr04	113700	1300	1.812911726	1994.737382
chr04	116700	500	1.303167922	647.1023404
chr04	120100	200	1.324300442	334.241188
chr04	126400	300	1.438492063	398.486263
chr04	131600	1400	1.848014921	2058.332082
chr04	148500	700	1.916666667	475.5535545
chr04	158800	300	1.093177811	349.8357397
chr04	161200	1200	3.272744969	3077.047726
chr04	180800	1100	3.316368823	2828.981693
chr04	188700	600	1.455770357	741.1404727
chr04	192000	300	1.05826172	399.9430839
chr04	212200	200	1.13900135	283.270963
chr04	226200	200	1.033710407	254.6131318
chr04	227300	200	1.187428384	291.2398309
chr04	228800	200	1.073322158	279.622035
chr04	230700	400	1.268986733	547.2705297
chr04	233400	200	1.152683218	289.0246582
chr04	233700	300	1.329068382	440.8899375
chr04	243100	200	1.350649351	271.6954343
chr04	245000	1800	5.39732257	5747.921316
chr04	247000	500	2.078868472	727.6020967
chr04	247600	400	1.313379534	570.2697387
chr04	248300	2100	3.617873652	5230.232196
chr04	251600	5100	6.926542276	18446.60147
chr04	257800	1100	1.804004777	1599.189024
chr04	264000	200	1.083120205	224.4721399
chr04	264400	200	1.239473684	325.2201433
chr04	264700	1400	3.080837252	2607.66561
chr04	266900	700	1.930851064	1103.340634
chr04	268800	200	1.214013729	312.5726019
chr04	269100	800	3.255988692	2088.70404
chr04	272500	300	1.676023392	539.0575019
chr04	273900	200	1.034966727	287.1643252
chr04	274200	1100	3.908359638	2672.831291
chr04	277100	1200	3.353140917	2759.895178
chr04	280400	300	1.879214276	525.7333719
chr04	280800	900	2.231816451	1521.198331
chr04	282300	200	1.015503876	243.0020626
chr04	282700	1000	2.536519326	1824.53443
chr04	283800	300	1.49786338	464.2835323
chr04	284500	400	2.108558994	447.093095
chr04	287500	300	1.573383085	421.1668182
chr04	288100	200	1.660413355	363.6671177
chr04	288400	500	2.863510848	1141.458804
chr04	289000	400	1.45735897	605.632382
chr04	289800	400	1.164587047	228.8464321
chr04	292800	1400	6.159797724	4987.861182
chr04	294300	200	1.157866059	313.5786514
chr04	294900	1100	4.473314607	3154.537361
chr04	296800	200	1.243010753	295.8827833
chr04	299800	1400	3.517241379	3135.36285
chr04	301600	200	1.47223418	223.2917788
chr04	302100	300	1.37254902	140.5144222
chr04	303300	1100	4.405145414	2548.933187
chr04	304700	1200	5.28328104	4061.268013
chr04	306000	1100	2.699788584	2026.613526
chr04	308100	300	1.346153846	386.8607287
chr04	308600	2600	3.876810712	5970.966867
chr04	312300	3800	4.421277185	9687.530115
chr04	316200	400	1.740196078	720.5197113
chr04	316700	700	2.486252354	1214.823842
chr04	320200	2600	5.559737454	10047.09159
chr04	324000	3200	4.936166618	10538.82664
chr04	328900	2600	6.775822114	11264.81508
chr04	332300	200	1.048910945	254.1319126
chr04	332600	2000	7.361904634	7714.081273
chr04	334700	2200	4.670798481	6577.653292
chr04	337000	1100	2.343492985	1950.682186
chr04	338300	200	1.113636364	210.7359307
chr04	338600	5300	8.188029323	20449.59696
chr04	344000	2900	4.813393769	8438.006808
chr04	347000	200	1.157880172	267.8255711
chr04	347300	1400	4.135422457	3589.162355
chr04	349000	300	1.116623473	397.8855161
chr04	349700	800	1.33321414	978.4808489
chr04	350600	1000	2.961110275	1954.665502
chr04	351700	2200	4.624610772	6835.215596
chr04	354000	200	1.020471308	273.4216727
chr04	354600	600	2.838183648	1197.415935
chr04	355500	1200	3.585639861	3324.790046
chr04	357400	2400	8.052542093	11173.71319
chr04	359900	1900	4.889308176	5140.886407
chr04	361900	3800	4.465707407	8928.723448
chr04	365800	200	1.260122447	267.3870198
chr04	367200	1100	4.068885449	3201.763982
chr04	368400	4200	8.67178594	16337.07385
chr04	376000	200	1.14428684	188.6303218
chr04	377500	200	1.107411012	314.0075921
chr04	377800	500	1.34629011	709.2668308
chr04	380500	2100	3.303417894	5211.007776
chr04	383000	3400	10.40882763	15438.9117
chr04	386800	200	1.609918001	347.4694607
chr04	387100	6700	11.66823332	27200.93062
chr04	394700	200	1.661538462	304.7778817
chr04	395400	300	1.78125	529.1385801
chr04	395800	13800	7.069904181	39429.98187
chr04	411100	1600	13.42960547	12105.99475
chr04	412800	1800	6.4	7103.605683
chr04	414700	500	1.94512907	792.8752162
chr04	416200	900	2.347770154	1482.605626
chr04	417400	200	1.052083793	227.8566114
chr04	418200	200	1.261698655	317.8979337
chr04	418600	700	2.178286241	891.1111226
chr04	419600	1000	2.039708663	1645.874893
chr04	420700	300	1.183782968	337.9893342
chr04	421500	200	1.263074485	307.1425541
chr04	424700	400	1.85282167	713.0037198
chr04	425200	1600	5.768302643	5593.453868
chr04	428200	1100	4.415119987	3452.208374
chr04	429600	1000	2.430329232	1727.965301
chr04	430800	300	1.204339195	354.9753832
chr04	431200	2000	5.271519796	5939.72826
chr04	433300	1500	5.976805832	4735.782173
chr04	435100	300	1.629137239	476.2537121
chr04	435600	1900	4.302625608	4761.575939
chr04	438400	1000	3.315803546	2291.788619
chr04	439900	1100	2.004759401	1830.064578
chr04	441700	1400	4.656841795	4241.011376
chr04	444200	500	1.285889962	616.1577949
chr04	445700	4800	5.512127498	14632.97246
chr04	450600	200	1.18343423	313.576356
chr04	451100	200	1.023297491	190.195027
chr04	452300	1300	2.554994824	2454.882721
chr04	455300	1300	3.102517986	2302.130535
chr04	457200	7100	11.38006289	41950.72872
chr04	464400	2100	2.008428657	2992.286913
chr04	467800	800	1.445526727	1126.441656
chr04	468700	200	1.492341085	381.6270913
chr04	469000	1100	2.373023256	1681.83415
chr04	471100	1200	2.796546547	2390.340908
chr04	472600	2400	3.688017429	5033.26858
chr04	475200	2500	5.100150602	7297.137972
chr04	481400	2100	2.435483871	3448.388006
chr04	484200	2400	2.724185701	4867.815581
chr04	487700	200	1.041516245	283.2560176
chr04	488000	1300	2.692631375	2856.432752
chr04	489400	1200	2.161094225	1810.193778
chr04	490900	7600	3.77728459	15924.39964
chr04	499400	900	1.579487179	1288.210029
chr04	501100	200	1.105493765	229.7028215
chr04	501400	1000	2.89647635	2705.743836
chr04	502500	200	1.065461904	272.6430084
chr04	502800	900	2.482758621	1874.316061
chr04	504500	1000	1.425925926	1158.388201
chr04	506000	1300	3.589363761	3753.451169
chr04	507600	1000	2.256279519	1676.044492
chr04	509300	1900	2.507826087	3413.47548
chr04	511500	400	1.275113208	547.5059877
chr04	512100	200	1.256321839	272.0420328
chr04	512400	200	3.006437041	668.5551436
chr04	514000	1500	6.663781775	6784.104215
chr04	515600	300	1.487228261	460.2770792
chr04	519700	300	1.27721694	341.4264224
chr04	520300	1900	5.342995169	5353.589983
chr04	522600	700	1.657431923	1045.523461
chr04	529200	2300	4.235107672	5172.313904
chr04	533300	2100	3.417466562	4788.75024
chr04	536300	200	2.76797829	535.8232289
chr04	536600	600	3.171108996	1237.551079
chr04	537500	200	1.381279341	323.2903268
chr04	0	600	6.322727782	3071.262879
chr04	2400	500	6.156654981	3385.955989
chr04	4800	1600	19.83240332	19656.75398
chr04	14400	1200	15.04233719	13252.55723
chr04	18300	3300	83.32799783	158790.2501
chr04	22000	10900	76.28429796	287827.6591
chr04	33000	3700	54.52807106	151695.3979
chr04	36800	700	6.235287976	4322.951274
chr04	39300	1400	11.57260379	11743.97122
chr04	53500	1100	7.977511277	7689.886619
chr04	61200	1300	8.39044289	8321.755776
chr04	64200	300	5.40897481	2031.448224
chr04	82700	300	5.561402889	2018.029529
chr04	83100	200	5.273865207	1548.648685
chr04	85300	200	5.48351606	1490.500417
chr04	93800	1300	9.69866242	10361.54488
chr04	95800	1500	10.6816997	11878.96171
chr04	98300	200	7.105481728	1454.357837
chr04	98700	1200	9.703525641	7965.631168
chr04	103900	200	5.076452599	1447.951549
chr04	104200	300	5.582537706	2141.48844
chr04	105400	200	5.022290376	1326.781352
chr04	105800	300	5.006735047	1864.507233
chr04	108300	1100	9.910133114	9227.532144
chr04	111100	1400	9.040048649	10399.66816
chr04	113500	1700	13.82828283	16886.41784
chr04	115300	1100	6.958028262	7117.123363
chr04	117200	400	6.752802691	2503.532187
chr04	117800	300	5.573875334	2009.235393
chr04	119600	3300	16.02505879	34164.86041
chr04	126200	400	6.582020765	2827.410178
chr04	126700	400	8.163682864	3111.866283
chr04	130800	1700	16.00884315	16618.37492
chr04	132600	600	5.301721675	3486.792978
chr04	135800	900	7.152276295	6047.565578
chr04	144800	1100	7.642250583	7882.830927
chr04	158500	200	5.428876128	1495.060742
chr04	162700	400	5.522106309	2526.92522
chr04	163500	1800	9.854388559	14595.43864
chr04	170800	800	7.549669148	5462.09169
chr04	171700	1100	7.033250552	7169.48626
chr04	174500	1100	7.621360568	7501.720269
chr04	184200	700	7.431013431	4740.555103
chr04	191300	1100	9.15008547	8381.684372
chr04	193000	500	5.583296703	3061.569098
chr04	193900	300	5.300232086	1932.733697
chr04	196400	300	5.706666667	1847.251104
chr04	207600	200	5.01181882	1377.097879
chr04	214200	300	5.034506538	1962.008323
chr04	214600	200	5.02159197	1438.182165
chr04	216800	500	7.297735618	3446.984463
chr04	219800	200	5.022285255	1452.041556
chr04	220100	1100	6.861329572	6907.888946
chr04	221400	1600	10.55830248	13729.20982
chr04	223200	200	5.168859342	1472.243968
chr04	248500	1100	8.249629786	8081.654996
chr04	252800	200	5.015282392	1377.409172
chr04	262100	400	5.891566265	2412.423268
chr04	262600	2600	30.625	42528.50686
chr04	281500	500	5.832947368	3195.695579
chr04	284200	1100	8.303613168	7513.123671
chr04	302100	300	6.848213621	2061.620606
chr04	308300	1300	8.852031099	9233.024428
chr04	310700	2800	62.89461199	71913.99665
chr04	314500	200	5.334590442	1484.362884
chr04	316600	300	5.182565789	1900.223375
chr04	354800	200	5.188984888	1452.373997
chr04	359900	500	6.600810114	3609.404775
chr04	360600	300	5.229354007	1854.117686
chr04	368900	200	5.356195887	1406.499207
chr04	380500	200	5.512773547	1383.118844
chr04	380800	6100	7.619501466	28447.81283
chr04	387300	500	6.560912539	3571.821506
chr04	402800	400	6.046741277	2548.578906
chr04	412900	200	4.999429224	1421.333497
chr04	417900	200	5.314233661	1510.311731
chr04	418600	1000	7.405961409	6879.234811
chr04	421300	800	6.282736156	4882.188749
chr04	423000	800	7.636748844	5674.461334
chr04	434600	400	5.862782939	2612.217703
chr04	440000	200	5.529953917	1531.873155
chr04	440400	300	5.206883423	1840.835287
chr04	444400	500	5.923716381	3012.31179
chr04	466300	300	5.51311676	1943.95659
chr04	477100	1200	10.8556663	10476.97175
chr04	482800	200	4.993548387	1390.405828
chr04	490300	2600	16.02009869	29147.94385
chr04	508600	1000	6.320991254	6249.264417
chr04	510000	200	5.038541235	1431.244601
chr04	514100	1100	8.357025311	8207.790362
chr04	521400	300	5.255021302	1861.964779
chr04	526200	300	6.187781036	2155.263203
chr04	532500	500	7.223919572	3437.546669
chr04	535700	700	6.974191386	4483.031935
chr04	2400	200	3.113872404	795.2069583
chr04	4800	400	3.936781609	1648.080712
chr04	9500	200	3.146127946	846.2091976
chr04	9800	500	3.774090772	2040.545792
chr04	14300	400	4.691142191	1765.329292
chr04	14800	1200	6.442518649	6601.922239
chr04	16100	1300	4.842550069	5513.261192
chr04	17500	600	4.050423591	2404.47113
chr04	18200	200	3.120486656	891.248034
chr04	20100	500	4.205826133	2079.7924
chr04	20900	500	3.969874187	1950.075639
chr04	21500	200	3.332108247	853.4232449
chr04	24200	1800	8.884046987	10232.25531
chr04	30800	400	3.235469983	1441.817278
chr04	34400	2100	6.654214359	9599.970159
chr04	36800	1400	6.843967421	7541.937854
chr04	38300	1400	9.37629196	9876.930987
chr04	45600	800	3.974782499	3104.430117
chr04	49300	500	3.819146943	1884.282407
chr04	52800	300	3.156305419	1112.156383
chr04	53700	200	4.595184909	1093.224214
chr04	54000	2100	12.55886525	17513.58217
chr04	56600	1100	7.141447948	6514.264755
chr04	58000	500	4.017857143	1976.436854
chr04	61700	1300	6.235898987	6168.948915
chr04	63200	200	4.054197107	898.946895
chr04	65900	200	3.664258394	855.8565636
chr04	67300	700	3.874707152	2568.998549
chr04	69800	700	3.489175978	2465.29283
chr04	73000	600	3.835579959	2291.186822
chr04	83900	1100	6.74352206	5944.760408
chr04	87600	300	3.678294574	1255.918277
chr04	89000	300	4.356555372	1442.434411
chr04	89400	700	4.524645945	2831.292287
chr04	93800	600	4.360305128	2484.745127
chr04	95200	800	4.31774744	3171.274559
chr04	101100	600	5.539086929	2658.352116
chr04	102300	600	3.646166134	2275.957764
chr04	103000	1000	7.627627112	5850.955607
chr04	105600	300	3.368012264	1114.170163
chr04	108200	1000	6.787162162	5454.070689
chr04	110000	1000	6.968253968	5171.370361
chr04	115700	800	3.69813946	3049.309609
chr04	118100	200	4.171715074	864.5590133
chr04	129900	1200	6.166171573	5623.258892
chr04	131200	6900	5.844208961	27947.69127
chr04	140300	2000	21.07298578	21066.86862
chr04	143200	500	4.637961988	2092.424953
chr04	144700	6400	33.71850746	82483.6013
chr04	151900	300	4.329278058	1480.843616
chr04	152300	700	6.824373379	4176.116183
chr04	153100	2200	10.02910355	14840.50442
chr04	156400	800	4.570443592	2996.984136
chr04	157900	2400	8.64786782	13289.35716
chr04	161700	1100	8.19868791	6248.81418
chr04	165400	600	3.730263158	2244.028159
chr04	166200	300	3.734055057	1269.369106
chr04	170200	1100	6.576435489	6696.579356
chr04	171500	200	3.151491974	897.3391359
chr04	173200	3100	7.000187935	15883.81701
chr04	176500	900	5.221624614	4047.739665
chr04	180400	500	6.217607656	2447.116976
chr04	182100	1500	6.375245459	6703.695627
chr04	189300	2000	6.295990453	9609.038347
chr04	202400	1400	9.581473367	8515.867374
chr04	204000	3000	13.3307644	22150.94745
chr04	207200	200	3.55	855.4727636
chr04	211700	200	3.097466638	708.6630091
chr04	216700	1200	5.538083538	5417.262348
chr04	218200	400	3.384233489	1566.393813
chr04	220000	1100	4.262533486	4224.334979
chr04	222400	200	3.487145851	902.1854345
chr04	222700	1000	5.372461219	4637.369479
chr04	229400	1400	7.021049164	6922.974048
chr04	234400	700	4.156853282	2698.750837
chr04	237300	600	4.087382333	2389.382927
chr04	238900	1100	4.253929122	4105.797865
chr04	249400	300	3.698739217	1296.96376
chr04	251400	300	3.655695435	1281.536118
chr04	251800	500	3.443291352	1884.239033
chr04	256500	800	4.712970917	3157.332008
chr04	263700	300	4.755230951	1475.756803
chr04	266100	1000	5.607430998	4484.560843
chr04	271100	1100	5.411766021	4879.953309
chr04	276600	600	3.544680851	2259.91076
chr04	279600	200	3.367775366	879.2947677
chr04	282800	200	3.133226488	899.1701073
chr04	283200	200	3.913091437	993.9089203
chr04	284700	2600	5.845946109	11240.47938
chr04	287600	200	3.420109479	911.7613446
chr04	287900	1200	3.997826087	4535.273722
chr04	290200	2500	7.727210113	13422.92183
chr04	292900	2000	6.874311782	8939.315155
chr04	297800	1200	6.024466248	5542.441789
chr04	299500	900	4.277595628	3719.583196
chr04	301200	2600	41.28464912	47678.56753
chr04	315100	300	3.881515383	1264.002041
chr04	318500	200	3.279659745	902.1635403
chr04	335800	300	4.022099448	1146.816737
chr04	336300	1100	5.910160463	5318.304348
chr04	347100	300	3.571572146	1180.954473
chr04	347700	1500	10.77926292	10817.92886
chr04	354500	700	6.561094017	3273.635946
chr04	361400	300	3.936533712	1133.144465
chr04	363100	500	4.03081761	1934.965724
chr04	364700	800	7.568299599	4678.412097
chr04	365600	200	4.153846154	1075.445533
chr04	380700	300	3.253421797	1213.830073
chr04	381100	300	3.567683686	1130.297993
chr04	381700	1200	10.56870399	8611.117526
chr04	383900	200	3.683955324	940.3143189
chr04	384500	800	4.269283985	3195.792708
chr04	386000	1200	5.139039907	4728.55275
chr04	387300	600	4.216816499	2329.859735
chr04	395900	1100	4.814827117	4631.384229
chr04	403400	1200	5.173306773	5261.428874
chr04	404800	600	3.730769231	2169.003805
chr04	406400	200	3.450803816	892.5758302
chr04	411600	600	5.305649388	2880.801383
chr04	412300	200	3.741141939	1045.600538
chr04	414000	1000	4.410652538	3929.485741
chr04	416000	1400	10.10207954	9196.847395
chr04	418600	200	3.847455625	966.2548108
chr04	420300	500	5.174552543	2337.832517
chr04	428600	200	3.37414966	834.7202331
chr04	441900	700	5.305130744	3443.088112
chr04	445800	1300	7.621319476	7657.447247
chr04	447300	1100	4.726912832	4710.959999
chr04	450900	500	3.984035235	2046.49554
chr04	452400	500	4.806085377	2091.040281
chr04	453200	600	4.751449164	2638.049376
chr04	453900	400	4.90573139	1937.249858
chr04	455500	1500	10.74888787	11748.57998
chr04	458900	500	4.303546099	2156.500699
chr04	460600	600	4.088788301	2486.581147
chr04	462000	1100	4.285615766	4218.915287
chr04	463700	200	3.248684116	859.2472673
chr04	464000	200	3.234504243	911.6131615
chr04	465500	400	3.49540762	1576.360624
chr04	468300	200	4.265645514	887.0306534
chr04	473900	500	3.68425454	1956.563932
chr04	481200	900	3.524247104	3152.237766
chr04	487900	200	3.172560976	835.5119183
chr04	488200	1000	5.535064935	4878.071166
chr04	489300	1900	8.460504484	10467.95206
chr04	493800	1200	6.625451211	6381.642403
chr04	497500	1100	5.921238645	5772.799824
chr04	500200	1300	20.00779549	14078.15377
chr04	503700	300	3.959512119	1306.783156
chr04	507500	200	3.475685411	774.8046474
chr04	509600	500	4.021546749	2042.007005
chr04	512700	200	3.188284946	904.2846976
chr04	513200	400	3.723150874	1415.819114
chr04	514300	3300	9.518129404	20540.07486
chr04	518100	1300	8.339171323	8026.605265
chr04	520700	200	3.306090609	935.6896754
chr04	521200	2300	11.56094396	14699.42468
chr04	523900	300	3.537493639	1187.619051
chr04	524400	5700	40.6593194	99156.324
chr05	12900	1100	3.202186847	2452.192424
chr05	15600	1400	5.225252876	4774.284474
chr05	18900	1700	2.61274323	3107.021813
chr05	21300	200	1.139504563	162.5340761
chr05	21600	300	1.687237458	497.856836
chr05	22400	300	3.286716931	435.0967979
chr05	24100	200	1.458044383	274.0449385
chr05	24400	500	2.317778623	893.0995961
chr05	27400	500	1.84947029	631.219955
chr05	28500	1900	9.335721502	9004.268426
chr05	30900	200	1.080351367	194.1045836
chr05	33300	700	2.074051859	1283.00463
chr05	35500	1300	2.485123384	2482.487267
chr05	36900	600	1.767497034	792.1072827
chr05	37800	1000	2.879260058	1770.666008
chr05	40200	1600	2.745951417	3176.646389
chr05	42500	200	1.075949367	307.0915883
chr05	43300	200	1.058092318	311.3330806
chr05	43600	1600	3.5823726	3752.1657
chr05	46200	200	1.100559249	264.0708332
chr05	49600	200	1.199684177	291.0835769
chr05	53400	800	2.5776759	1493.819789
chr05	55200	300	1.880079465	570.839159
chr05	57700	200	1.059992639	181.1454652
chr05	58000	1100	2.950794482	2500.752956
chr05	60400	1100	2.511111111	2112.760775
chr05	61700	400	1.431818182	513.0773258
chr05	62200	1300	2.994791667	3135.101025
chr05	64400	1000	1.972741593	1571.055965
chr05	66400	200	1.313080495	263.0505819
chr05	67100	1100	4.743463433	3967.143968
chr05	70400	300	1.503120666	401.7620615
chr05	71500	400	1.430780933	523.0202024
chr05	73800	500	1.78485037	793.2204922
chr05	74500	300	2.754515599	754.8843012
chr05	74900	200	1.501421464	159.8934321
chr05	75900	300	1.669376694	506.8065663
chr05	77600	500	2.429422067	885.1968475
chr05	78400	300	1.636772319	459.8366333
chr05	79000	400	1.872	668.6890911
chr05	80200	800	4.923451009	2136.611995
chr05	82000	900	2.643163178	1544.654794
chr05	84000	1900	5.789878504	6014.993765
chr05	86500	500	3.900970295	1501.8485
chr05	88300	1100	2.611696513	2282.25314
chr05	89600	1200	2.063457537	1967.366076
chr05	93600	200	2.678571429	199.1541353
chr05	94400	200	1.142105263	228.6217977
chr05	102900	3100	12.485587	19264.03853
chr05	106100	2100	5.340741279	6197.919863
chr05	108500	300	1.302773179	411.8407067
chr05	109000	700	2.536820257	1339.086699
chr05	110000	2100	5.505173876	7409.51465
chr05	112800	400	1.551118178	631.2035361
chr05	113300	1400	2.150490529	2434.942518
chr05	115000	400	1.447791478	545.7472822
chr05	120600	1200	2.446009932	2341.047367
chr05	121900	200	1.070993915	301.1876882
chr05	122400	1400	1.888888889	2130.157733
chr05	133200	1200	6.473051621	5117.165801
chr05	135200	1100	2.951712287	2660.209595
chr05	137600	800	1.546062053	1047.762703
chr05	138500	200	1.62533306	371.6561143
chr05	139300	400	1.298656889	551.3754339
chr05	139800	500	3.010628882	1122.473589
chr05	141300	1200	2.888357801	3087.328865
chr05	145100	200	1.430349522	357.0034826
chr05	146700	1400	3.821223821	3544.54919
chr05	153000	2600	4.092271035	7195.432886
chr05	157100	1400	1.906060606	1881.661568
chr05	159000	1200	3.918376914	3005.601895
chr05	160600	1000	2.3296875	1498.999122
chr05	161700	500	1.606407323	731.5602635
chr05	164200	300	1.283826306	442.752874
chr05	165000	1000	2.26762002	1927.444518
chr05	166400	300	1.642726013	459.7235162
chr05	166900	500	2.046775445	890.5707816
chr05	167600	400	1.331950207	537.0585579
chr05	168100	1900	4.094444891	4976.785794
chr05	172200	1600	5.894014893	4853.19585
chr05	174300	1300	3.308462728	2661.546411
chr05	176800	1700	4.984319527	4521.057454
chr05	184100	2200	3.886582962	5167.509122
chr05	188400	1000	2.306161681	1666.622781
chr05	190300	200	1.149207364	300.5496247
chr05	192200	300	1.536657599	362.9920256
chr05	194000	1100	2.801478649	2498.696958
chr05	197000	2100	8.527530902	9677.937369
chr05	200600	1000	2.120305749	1576.314983
chr05	202100	1500	5.198161245	4720.130456
chr05	205500	1500	9.245587107	7495.115141
chr05	207300	200	1.232704403	202.8473611
chr05	209500	200	1.092198582	251.9306697
chr05	212800	3100	4.707679925	10094.01033
chr05	216300	500	1.600331744	714.3727214
chr05	216900	1100	2.582092736	2329.72013
chr05	220100	400	1.569174387	632.6836215
chr05	220600	1100	2.62282184	2283.939499
chr05	221900	1000	1.873585477	1391.086422
chr05	223400	600	1.681855501	919.6551474
chr05	226600	4100	5.201585193	11857.81913
chr05	230800	5300	5.70416143	16180.7457
chr05	238100	1200	3.436781609	2386.942015
chr05	239400	1400	4.490586872	4400.158326
chr05	241100	500	1.660918186	718.4820637
chr05	241700	500	2.500740741	1023.809466
chr05	242400	2000	7.825179159	8752.30508
chr05	245300	300	1.551879699	488.9942306
chr05	245700	1600	3.635833769	4195.669087
chr05	247400	3100	7.165941398	12509.65551
chr05	250600	2600	4.217351177	7964.732022
chr05	253400	400	2.031602709	717.5829351
chr05	253900	500	1.879883791	894.6713233
chr05	254500	1100	1.826886493	1681.165307
chr05	256100	1300	2.660708291	2438.610907
chr05	259900	5700	10.32396476	29611.58795
chr05	266200	1900	4.118199761	5368.356363
chr05	269300	200	2.446222293	472.9234239
chr05	269600	3000	8.301814022	13981.78309
chr05	274200	400	1.90607644	654.5186627
chr05	274700	1200	2.481556963	2443.241033
chr05	276100	1200	3.075965131	2783.760004
chr05	281000	400	1.352275125	554.4326055
chr05	281600	200	1.311361718	302.1954238
chr05	282400	1600	2.943148144	3131.030996
chr05	285200	2400	8.325963252	10907.71653
chr05	288100	1000	2.823492314	1956.955633
chr05	289200	2100	9.146058423	9068.944543
chr05	292900	900	2.4	1985.681874
chr05	294900	600	1.904371585	1041.922349
chr05	296800	1200	2.355893621	2230.79416
chr05	298300	1100	2.532355489	2190.042623
chr05	299700	1300	4.799705166	3617.938641
chr05	301200	200	1.193776521	214.6265633
chr05	303100	400	1.361111111	533.2104611
chr05	303700	300	1.794305213	521.5380947
chr05	304400	1000	3.809139785	2109.926827
chr05	306700	400	1.357142857	531.970696
chr05	307200	2400	7.217391304	8619.109473
chr05	311300	1300	1.941185423	1988.949638
chr05	312700	200	1.104809104	309.1508762
chr05	314200	300	1.460510078	389.6251573
chr05	314700	600	1.726227209	978.7406118
chr05	317300	200	1.200174064	207.7283209
chr05	319100	1000	2.252919058	1530.351259
chr05	320300	200	1.136897362	299.5186116
chr05	322100	2700	8.771520069	11269.71616
chr05	325700	200	1.144244105	291.6177543
chr05	328600	200	1.498922269	378.2583439
chr05	328900	200	1.221070172	272.2969689
chr05	329200	1200	5.397023191	4238.131251
chr05	331600	200	1.210160819	296.6661312
chr05	331900	1400	7.682566088	7232.543386
chr05	336300	600	2.255410256	814.8881186
chr05	338700	1600	2.798793335	3167.379635
chr05	341000	200	1.125023814	221.573925
chr05	341300	1900	4.581217498	5572.097877
chr05	344100	300	1.329032258	469.5100028
chr05	345500	1500	8.440169389	7930.820225
chr05	347900	1100	2.417554737	2214.286138
chr05	349800	500	1.529051988	653.7213285
chr05	351100	900	3.569040248	2090.290688
chr05	352100	1000	2.602824859	1858.865979
chr05	354300	600	2.018199705	959.462582
chr05	356000	2200	4.263244353	5985.576793
chr05	360000	800	3.133603239	1598.25485
chr05	362400	1100	2.201955362	1898.539264
chr05	363700	1200	2.168769081	2186.296992
chr05	365000	200	1.16564952	222.1054332
chr05	365900	600	1.950320513	1061.569582
chr05	367400	700	1.594236707	1101.142695
chr05	368400	200	1.275537446	323.3173684
chr05	368700	800	2.200339772	1375.246039
chr05	369700	400	1.639368507	632.9262893
chr05	371000	1300	3.52259887	3264.376853
chr05	372400	2300	3.439445629	5058.068905
chr05	374800	1000	3.73979798	2144.3381
chr05	376600	400	1.486956522	602.9883763
chr05	377200	1400	5.864998455	5675.464764
chr05	378700	300	1.611072713	455.8614617
chr05	379300	1300	3.655516096	3380.264473
chr05	382900	400	1.581663657	640.6244074
chr05	383500	200	1.114691309	252.3349711
chr05	385100	200	1.241666667	278.0679352
chr05	385400	4400	7.989745655	14614.06095
chr05	390500	200	1.292763158	307.5336414
chr05	390800	800	2.061084075	1157.008749
chr05	391700	200	1.19975793	330.9101231
chr05	393900	5100	14.19206729	28523.59315
chr05	399400	300	1.791845761	464.3311355
chr05	399800	700	3.066295035	1473.326285
chr05	400600	200	1.657081014	205.2106202
chr05	401400	200	1.245209083	263.5658193
chr05	401700	1900	3.013708726	4177.193325
chr05	404400	200	1.388880652	279.278798
chr05	405300	200	1.075630252	264.0702053
chr05	405900	200	1.59771987	281.8700223
chr05	406200	6600	6.573048838	20960.33402
chr05	412900	4800	4.04548691	10949.58393
chr05	418200	2600	4.595436508	8670.543142
chr05	422100	800	2.095433394	1368.461581
chr05	424300	300	1.501893939	398.110758
chr05	424700	500	1.278861789	682.7462438
chr05	425300	400	1.903230746	751.2086358
chr05	427800	300	1.419039643	434.9835075
chr05	431500	900	1.729084559	1360.18219
chr05	434600	500	1.304337539	599.7575247
chr05	441500	400	1.307440101	585.3296633
chr05	442000	600	2.016683762	879.3968651
chr05	445800	200	1.423464075	190.2056336
chr05	446200	200	1.136864813	245.0773535
chr05	451700	300	1.491297209	407.734171
chr05	493600	200	1.075503748	240.7762448
chr05	502900	700	2.170405226	1234.556303
chr05	510500	500	1.792121212	768.754003
chr05	511100	300	1.448852833	492.8920735
chr05	522900	200	1.138415932	228.4333495
chr05	525100	300	1.89901381	509.9542008
chr05	532700	200	2.261004891	477.1843208
chr05	534200	400	1.803220036	606.599425
chr05	546900	700	4.74382716	2222.776158
chr05	553400	1100	2.939189189	2152.033108
chr05	555800	400	1.217604298	555.7341997
chr05	556300	300	1.196787149	452.3768218
chr05	559800	800	1.540683962	1051.351098
chr05	574800	200	1.095652174	302.8643286
chr05	575200	200	1.098147609	311.2887745
chr05	585500	500	1.601726357	761.2793747
chr05	597200	200	1.250726302	266.6586291
chr05	600200	1000	2.468294574	1842.237603
chr05	601300	200	1.171057253	207.7605872
chr05	604200	300	1.524001864	437.4519806
chr05	608000	400	1.357142857	452.0122063
chr05	623300	700	5.195054945	2811.504121
chr05	624100	300	1.634615385	305.0816224
chr05	629600	-629600	50.95714286	-7407934.272
chr06	7700	2000	19.80650564	28508.80658
chr06	10600	500	32.16078431	6314.209816
chr06	11300	2200	7.751567398	10661.54676
chr06	14500	1300	10.01744498	8683.508142
chr06	15900	300	4.603174603	772.3809524
chr06	16500	2400	18.69937566	23797.65028
chr06	19200	2000	40.97024908	41244.33589
chr06	22100	1700	12.04519718	12660.40036
chr06	25500	2000	12.33158433	17315.16148
chr06	36200	200	3.556913675	819.0052166
chr06	39600	1200	23.21160916	19722.53409
chr06	44500	1300	8.630400473	7023.556974
chr06	46300	200	2.297892808	655.2891332
chr06	46600	800	3.860334371	2523.381054
chr06	47700	700	4.315464808	2369.585817
chr06	49700	300	2.49793621	901.9490525
chr06	50300	200	2.672440945	691.3613385
chr06	51200	200	2.706486834	730.5856741
chr06	51500	1100	5.075630252	4374.257454
chr06	52700	1200	5.296167247	4623.06212
chr06	57200	300	2.904381124	976.2055091
chr06	57700	1100	6.771398433	4429.023336
chr06	60900	500	3.233590734	1372.846247
chr06	73300	300	2.424154589	677.2070942
chr06	74700	2100	6.146068985	8070.623122
chr06	77700	3300	9.616467923	20506.99333
chr06	82500	1100	4.018073219	3356.03522
chr06	86000	1400	5.917094017	5170.470888
chr06	87900	200	2.476557597	639.4643256
chr06	90000	400	2.481217659	1080.185286
chr06	90800	1800	5.70414624	7015.798824
chr06	96100	200	2.553030303	702.542801
chr06	96400	200	2.381043257	635.3564414
chr06	97500	1100	4.27769974	3865.605205
chr06	99000	800	3.270172783	2304.743913
chr06	100800	500	3.272033898	1543.174126
chr06	101400	400	3.082906469	1291.581233
chr06	103500	2700	11.34707015	17225.75531
chr06	108100	300	2.417389049	741.1047642
chr06	109700	400	3.89349629	1490.276413
chr06	110800	1100	7.005238514	6107.910529
chr06	112700	300	2.82815806	869.0743814
chr06	113100	1500	14.69016875	14946.01097
chr06	115800	3600	9.16024986	16340.40942
chr06	119500	300	2.979014153	921.759312
chr06	120200	200	2.466358246	676.8796109
chr06	120900	200	2.238178038	663.2743636
chr06	121700	200	2.255806182	568.7448693
chr06	122000	200	2.827437297	733.2715512
chr06	122300	1700	5.527038751	6852.661474
chr06	124100	300	2.835933297	921.3187213
chr06	124500	1300	6.628432129	6304.701624
chr06	127900	1400	5.430542986	5194.350117
chr06	131400	200	2.682997118	583.3401058
chr06	131900	200	2.310091156	621.4900451
chr06	132600	300	2.720263381	851.6111585
chr06	135600	2000	3.731750241	5402.75534
chr06	145900	500	2.816015779	1460.132401
chr06	161600	900	7.166666667	4661.147186
chr06	167800	3300	2.343552311	3475.388834
chr06	174200	500	2.640486209	1373.10982
chr06	181500	900	3.043126099	2580.329939
chr06	186500	200	2.264319249	620.9057444
chr06	187300	1300	7.580234506	6426.864024
chr06	191600	200	2.555840822	578.2162825
chr06	194300	1100	6.101918221	5472.391117
chr06	202500	300	2.296052632	874.4164966
chr06	203700	1400	11.09638872	9915.479476
chr06	205200	200	3.38372093	829.1909527
chr06	209700	200	2.351778656	577.7950311
chr06	210500	1200	3.441439875	3387.026341
chr06	211800	1100	7.05298913	6137.373802
chr06	213200	500	4.042168675	1366.406271
chr06	216200	200	2.441562818	625.0837667
chr06	222000	1400	9.651354535	10341.33221
chr06	225800	200	2.877643909	668.6286602
chr06	226700	200	2.410696517	639.6011837
chr06	227000	300	3.127920561	1002.750608
chr06	227800	1500	4.519226059	5070.64625
chr06	229700	4000	16.30985468	29705.93784
chr06	233800	2500	5.726160089	10371.76014
chr06	236600	1000	3.766757123	3147.639861
chr06	242600	2200	5.2125	8479.164633
chr06	246700	2000	5.851267307	7916.061788
chr06	251300	600	3.930663479	2007.378006
chr06	252700	400	3.897251662	1235.555404
chr06	254200	600	2.869314911	1689.426329
chr06	255000	200	2.625149261	676.6022408
chr06	256700	1300	6.946778711	5789.971931
chr07	1900	1900	15.63435776	12101.75949
chr07	4700	200	1.528142589	328.1778407
chr07	9500	2200	34.00346021	28154.38563
chr07	12600	5900	24.82163573	66335.70381
chr07	19600	1700	6.539344122	6849.109311
chr07	22700	2800	16.69051638	32424.39313
chr07	26100	1800	8.948637009	9400.358268
chr07	33200	400	1.923591213	812.5228438
chr07	34800	1300	4.279060259	3843.430533
chr07	36600	200	1.72676182	405.9446695
chr07	38300	5600	5.69483483	19994.40191
chr07	44100	1600	7.663157895	7273.354672
chr07	45900	800	3.348710991	1801.862928
chr07	48500	600	1.760417885	1008.945944
chr07	49600	2700	5.302860327	10496.72535
chr07	54000	800	2.087136432	1543.770691
chr07	54900	200	1.857606679	486.7821129
chr07	55300	600	2.1923842	1240.127279
chr07	57400	1900	3.77908805	4495.389944
chr07	59500	1700	5.392434542	5636.91657
chr07	61600	200	2.060658228	375.0861997
chr07	72400	200	1.532863259	385.2922501
chr07	78200	200	1.459459459	363.6921654
chr07	78700	300	1.65719116	570.1698543
chr07	79300	1500	3.752773669	498.2398716
chr07	86300	200	1.505925968	307.9200772
chr07	87600	300	1.48737721	491.4762819
chr07	88300	200	1.482594393	377.9763433
chr07	88700	700	2.180034553	1352.953999
chr07	95300	300	1.727179487	604.6600944
chr07	95900	200	1.523809524	392.3195084
chr07	110800	900	2.581280788	1880.856274
chr07	111800	200	1.800653595	469.6885233
chr07	112100	800	2.92213196	2121.879529
chr07	118000	500	2.494679719	1059.002295
chr07	123300	300	4.375	533.6273717
chr07	123700	200	1.638615433	501.6098558
chr07	124800	800	4.357196308	2388.773526
chr07	129600	200	1.485805678	364.4130537
chr07	138500	300	1.680781939	573.7488028
chr07	163800	1800	5.121345365	5631.574717
chr07	185900	400	1.598707428	635.6882398
chr07	192300	900	1.960672788	1596.554221
chr07	200600	300	2.02020202	605.6291066
chr07	208300	300	1.491306483	552.872728
chr07	208700	200	1.539990233	420.7880767
chr07	212700	300	1.72606222	545.3665412
chr07	213200	500	1.650468173	880.777286
chr07	215100	500	1.850833477	942.881188
chr07	215700	500	2.747973638	1266.97316
chr07	216900	1100	2.21385883	2063.077189
chr07	220800	200	2.411821705	491.6145257
chr07	221100	300	1.666182251	534.3650125
chr07	224200	500	2.980657543	1220.335007
chr07	226900	200	1.453416149	319.5430033
chr07	233500	1000	3.988248028	2654.374394
chr07	235200	500	1.507274491	850.8236829
chr07	239700	1100	6.690301003	5874.081016
chr07	248200	200	1.468599034	335.3237081
chr07	252200	300	1.542598455	546.7082586
chr07	252600	500	1.613720161	886.3860895
chr07	257900	300	1.427748531	533.8950986
chr07	263400	1100	2.405199477	2404.22033
chr07	268000	700	1.923632489	1286.009966
chr07	277200	200	1.450854573	398.2206626
chr07	277500	500	1.94448168	989.7595991
chr07	285100	400	1.826505711	757.4978945
chr07	286500	1500	2.761378199	3215.961135
chr07	292000	1700	8.018263718	7444.123893
chr07	295200	200	1.778317627	438.3058842
chr07	295500	300	2.233358754	687.5108128
chr07	295900	600	2.720665897	1375.188901
chr07	297200	200	1.485429993	336.4192329
chr07	297500	600	3.753540373	1427.032856
chr07	298900	2200	4.888888889	7291.891957
chr07	301800	1400	5.212483659	5321.343479
chr07	304100	500	2.726176471	1181.417914
chr07	304900	500	2.401527203	987.6857628
chr07	305500	500	1.962303665	1024.031078
chr07	306100	200	1.636785097	460.9251177
chr07	306400	400	1.99934555	802.1600707
chr07	307900	800	1.871634742	1258.974892
chr07	311100	200	1.426691729	304.3910468
chr07	311700	500	1.694029851	819.2589512
chr07	314700	1100	2.995577396	2829.734444
chr07	316900	1200	2.888253353	2608.699678
chr07	318300	900	3.942539039	2591.26325
chr07	319900	2400	4.100834611	6334.467246
chr07	323500	300	1.625566254	555.7384778
chr07	323900	2000	3.66862216	5389.046693
chr07	329400	300	1.748826374	607.1945267
chr07	331300	900	2.251027679	1928.798394
chr07	332300	200	1.958579773	496.2324296
chr07	333700	2000	11.59274401	13701.50076
chr07	342600	1000	3.716702209	2843.057536
chr07	345900	4100	24.01663766	40941.59895
chr07	350400	200	1.423192771	348.586401
chr07	351000	4300	17.12492526	26335.79237
chr07	357600	1100	3.1244488	2744.699551
chr07	359700	1100	3.769262028	2899.296691
chr07	360900	1900	3.625035521	4568.475439
chr07	363500	2400	6.853463588	11050.31516
chr07	366300	1900	3.701810132	4818.820073
chr07	368300	500	2.088906069	1010.492338
chr07	370000	400	1.887420814	698.4609821
chr07	371200	2100	4.826724138	6568.910694
chr07	373400	200	1.893884892	451.6209175
chr07	374700	900	2.113193813	1770.080306
chr07	378200	200	1.790196368	460.4115871
chr07	378500	400	1.528032943	629.123754
chr07	379800	2100	4.931962604	6877.10786
chr07	382000	2900	5.456032538	10053.44388
chr07	385000	200	1.891154607	412.9384183
chr07	385800	200	2.491978126	489.0440137
chr07	386100	300	1.960597826	644.9942521
chr07	387600	200	1.538630137	338.4015116
chr07	388000	300	1.9403827	623.6650183
chr07	388700	400	1.789017874	707.5548579
chr07	390700	2100	4.153732446	6135.330928
chr07	395500	500	1.800203252	806.3413473
chr07	401100	200	1.560706199	401.2717075
chr07	411400	200	1.416204218	305.7495604
chr07	412300	200	1.439085817	393.040894
chr07	412600	700	1.78747336	1114.56347
chr07	417100	200	1.465811135	389.7473389
chr07	424000	200	1.486443195	408.54344
chr07	445300	400	3.127873563	1147.093434
chr07	455500	200	1.518665482	292.4092053
chr07	457600	300	1.992859461	645.9363377
chr07	470400	600	1.914062686	1102.469822
chr07	471100	200	1.436436436	383.0994511
chr07	474000	2100	3.540137974	4536.965334
chr07	484100	1200	3.949353956	3293.587795
chr07	485500	200	1.47826087	236.9999769
chr07	495300	500	2.119448698	903.3090673
chr07	522600	200	1.491091675	429.1940562
chr07	522900	600	1.932057057	1155.682391
chr07	532200	1100	1.912944884	1754.069626
chr07	560300	500	2.037852836	1018.514308
chr07	566900	600	3.128899836	1596.384448
chr07	567600	200	1.697626419	434.7665841
chr07	602900	300	1.63878017	384.023956
chr07	610300	3900	6.875	13766.66667
chr07	614300	1500	5.5625	5469.356444
chr07	615900	200	2.461538462	632.6585695
chr07	616200	400	1.458806818	677.6572638
chr07	633800	500	1.710989315	909.2179567
chr07	646000	300	1.550216888	569.2649917
chr07	646400	200	1.906639477	451.3654237
chr07	647700	200	1.985286574	460.9772893
chr07	654200	300	1.496573209	573.4850569
chr07	664300	300	1.759259259	479.8169534
chr07	664700	900	2.554159186	2085.28198
chr07	665700	700	2.443526538	1437.088807
chr07	670400	300	1.701021021	561.8599745
chr07	670800	800	2.897343331	1821.173135
chr07	671700	200	1.70607924	205.5620272
chr07	672800	2100	4.226190476	5940.077866
chr07	677400	300	2.471878225	751.6988492
chr07	679200	200	2.070116618	384.4857729
chr07	679500	200	1.489935065	385.4167833
chr07	685300	1900	7.450491739	8747.55632
chr07	687900	2200	6.249151584	8412.747153
chr07	691000	3100	4.623466578	9246.928376
chr07	696400	1000	3.826283988	3195.539643
chr07	697500	1000	2.545454545	1956.006337
chr07	698600	300	1.75	608.2985859
chr07	699100	200	1.501263082	338.5524631
chr07	699500	1600	8.394532844	8100.890083
chr07	705200	400	2.296447197	936.9478509
chr07	705700	200	1.417689531	412.0298289
chr07	706500	200	1.526623053	365.1749271
chr07	706800	1100	3.026269904	2355.008244
chr07	709600	200	1.648097626	380.2799432
chr07	709900	10200	11.82707207	56252.83121
chr07	721200	1100	2.835974258	2307.41188
chr07	722500	900	2.908973843	1874.423842
chr07	723800	4300	7.181363747	16118.65953
chr07	729200	1300	5.006401084	4909.927632
chr07	730600	1100	9.865017668	5420.925586
chr07	732400	500	2.405917982	980.3671733
chr07	734500	1100	5.32942899	3948.675146
chr07	737900	700	4.488262911	1767.876369
chr07	740600	2100	7.036755387	8736.57881
chr07	743200	2500	3.773847204	6745.964907
chr07	747000	4100	6.194150937	12787.68137
chr07	751300	1100	3.838406958	2233.76817
chr07	752500	1100	3.134125637	3053.624505
chr07	753700	1100	3.709443099	2698.770213
chr07	756700	500	2.704929711	1244.412957
chr07	757400	1400	3.866820777	4236.338764
chr07	761500	1100	3.387262357	2632.09496
chr07	772400	2000	8.733886912	8877.161613
chr07	775400	600	2.020531401	1076.78694
chr07	776300	200	1.587440042	371.6081178
chr07	776900	500	2.467559353	1003.242211
chr07	778100	200	1.655882353	350.6218278
chr07	783900	1200	4.397191692	4186.401336
chr07	787300	4700	12.91436114	24493.14832
chr07	792300	2500	12.06251826	16478.77357
chr07	794900	1800	3.267702211	3541.527102
chr07	796800	5400	9.226086957	25826.77574
chr07	803600	1400	5.455108359	5211.022132
chr07	805400	200	1.789823322	432.5547073
chr07	807700	600	2.493814433	1343.65512
chr07	808400	2500	8.337547854	10170.51752
chr07	812800	2300	6.067174943	8239.249202
chr07	815800	3500	7.724984888	15651.34977
chr07	819400	3400	7.374052119	13853.56977
chr07	823100	3400	8.570198577	15717.88992
chr07	827600	1800	7.548043926	9320.369228
chr07	829500	4600	7.804398827	18671.95669
chr07	834200	2100	4.263818193	6163.794025
chr07	837300	200	1.476194211	401.1007046
chr07	837600	400	1.798257109	749.1583171
chr07	838200	300	1.655121951	565.4038644
chr07	840200	300	3.055482744	812.8233806
chr07	841100	200	1.78292469	449.8216683
chr07	841800	900	7.341194989	3964.312053
chr07	842900	1800	9	9895.467928
chr07	844900	3500	7.525128205	15097.84206
chr07	848500	200	2.739336493	615.94459
chr07	848800	400	3.439613527	1162.724552
chr07	850900	3000	16.26077565	26140.61153
chr07	854000	300	2.283091977	629.825993
chr07	854400	1100	3.954287491	3574.172273
chr07	855800	2000	5.137281406	6961.217414
chr07	859200	2000	11.6960372	12944.99847
chr07	861800	900	2.932692308	1727.555127
chr07	863700	1300	4.312544345	4158.553429
chr07	866400	1100	4.298850575	3552.461034
chr07	868200	2600	6.150662252	8971.760645
chr07	875500	200	1.557768924	402.2019165
chr07	876100	400	2.392207162	889.0500458
chr07	876800	1400	3.244576346	3572.026961
chr07	878300	300	1.936046512	573.2199837
chr07	878700	200	2.087195574	444.7692767
chr07	881000	200	1.561867373	341.4564123
chr07	882700	1900	4.54069299	4837.063676
chr07	884700	600	4.471222076	1597.823363
chr07	887000	300	1.621496092	586.9416634
chr07	887900	200	1.425101215	378.6975366
chr07	888500	400	2.760368664	1054.416656
chr07	890700	200	1.457711443	281.7312931
chr07	891000	300	2.576661815	514.4801275
chr07	892400	7300	2.360254083	-290.1766794
chr07	913800	300	1.869071973	663.7245759
chr07	916500	400	1.901396454	831.3616269
chr07	918600	2600	6.505813953	9545.367578
chr07	921600	200	1.480172414	428.0152526
chr07	922400	200	1.530922578	425.229847
chr07	922700	800	2.212038835	1589.91218
chr07	923700	200	1.595300928	416.395116
chr07	924000	2400	3.921800705	6629.438996
chr07	926500	1600	3.065099458	3919.957753
chr07	929200	200	1.716299813	414.9241104
chr07	929900	200	1.443994931	380.3910717
chr07	931900	200	1.522821979	398.3839552
chr07	932400	600	1.931964809	494.8128072
chr07	934000	1500	11.20730779	10581.25208
chr07	937400	500	2.667501701	1126.764121
chr07	938000	1400	3.908584169	3284.085465
chr07	941800	200	1.467231297	377.8955852
chr07	942200	700	2.409269286	1461.349593
chr07	943000	300	1.588046486	513.6020363
chr07	944700	200	2.197033898	502.3360965
chr07	945000	500	2.356557377	1178.277774
chr07	945600	200	1.835443038	562.6494853
chr07	945900	600	2.934878049	1471.504931
chr07	946900	1600	7.35615963	7692.753271
chr07	950400	1100	3.888610662	2918.055092
chr07	955900	1600	2.881804242	2922.763442
chr07	958600	300	1.669090909	472.9720438
chr07	961600	300	1.984116659	633.407351
chr07	962000	300	1.88258317	386.8503193
chr07	963200	1100	3.115625616	2796.890428
chr07	966000	700	2.620309478	1431.945921
chr07	978000	500	1.724675746	905.2449683
chr07	979200	5100	11.27020307	23694.67779
chr07	985500	400	2.426436957	933.3838516
chr07	988600	400	1.936920223	804.7735647
chr07	990100	1200	2.883199445	3117.189127
chr07	991400	3000	3.575057181	6577.192392
chr07	996000	1800	9.618352817	9545.711001
chr07	999100	700	1.436758084	954.0594299
chr07	999900	700	2.060478598	1313.539196
chr07	1001400	1400	10.31435929	9144.854514
chr07	1003900	700	2.697864723	1589.300598
chr07	1005800	400	3.437245996	1028.64134
chr07	1006800	500	1.808776612	940.9311046
chr07	1007400	500	3.046081993	1023.12666
chr07	1008200	2000	3.340569623	4387.685834
chr07	1010300	300	1.603140334	580.5683827
chr07	1011600	900	3.082077826	2077.621331
chr07	1014600	2300	6.067487081	8676.660283
chr07	1018000	1700	4.870481597	5135.48428
chr07	1021000	6600	1.983070348	7048.710899
chr07	1028200	300	1.505154639	560.8206186
chr07	1029200	200	1.598173516	403.9907333
chr07	1029500	4400	6.42	12388.08984
chr07	1035500	1100	2.271622556	2115.252308
chr07	1036700	1800	6.977010972	7632.96281
chr07	1038600	2700	8.40432386	10693.20019
chr07	1041500	200	1.457532051	394.8649593
chr07	1043000	200	1.448549835	328.7612437
chr07	1043300	1900	8.44483429	8665.478854
chr07	1046200	700	2.102317345	1255.336881
chr07	1048000	200	1.467550274	393.9009178
chr07	1048300	700	2.799875882	1686.239767
chr07	1051400	400	1.568286003	686.5964537
chr07	1051900	400	1.782419716	676.1847101
chr07	1057700	200	1.438596491	370.855737
chr07	1071000	800	2.184680544	1620.50501
chr07	1083000	300	1.613440749	590.0813347
chr07	1086600	400	1.665385623	710.972937
chr07	1087700	1100	2.303465927	2342.694706
chr07	1088900	300	1.688215212	533.3796312
chr07	1089300	1900	3.195484108	4189.397381
chr07	1091300	400	2.18906628	886.2305121
chr07	1091800	400	2.245047689	967.7640011
chr07	1094200	200	1.673708984	282.6124624
chr07	1102800	3100	8.556818182	13451.7334
chr07	1106400	500	3.045833333	1172.57753
chr07	1127000	900	2.155342432	1711.785315
chr07	1139400	1000	2.146148308	1991.002228
chr07	1148300	200	2.150370082	482.3541566
chr07	1148800	300	2.111111111	636.890617
chr07	1160000	800	1.621763754	1347.127988
chr07	1163000	200	1.421274706	346.3448447
chr07	1168200	300	2.453362231	557.5856988
chr07	1168600	1600	13.89340614	10668.75897
chr07	1171400	1100	2	2130.555914
chr07	1172600	1700	3.072385689	4070.882708
chr07	1174400	300	1.683501684	570.1643106
chr07	1175000	4900	16.29224599	31143.90684
chr07	1180000	5000	11.51215805	17959.9045
chr07	1185100	1300	5.467320261	4569.745175
chr07	1186800	2400	5.969545025	7257.864072
chr07	1189900	1200	11.71339861	5239.179127
chr07	1192800	1800	13.21787532	14656.99228
chr08	4900	200	5.191650854	203.3508027
chr08	5300	300	1.949981877	35.21543023
chr08	6600	1800	21.34056304	9477.360259
chr08	11900	500	1.760284698	523.0349291
chr08	12500	200	1.050747025	-1.982200709
chr08	13300	300	5.694381705	1202.573132
chr08	16400	2200	2.909303477	4048.728034
chr08	23100	1400	2.513122501	2396.344052
chr08	36700	200	1.082987658	207.4132776
chr08	39300	600	1.806117193	883.5384183
chr08	40100	200	1.33021966	341.5307266
chr08	47900	400	1.206186074	552.9982379
chr08	51200	400	1.314677767	532.4325005
chr08	52300	200	1.197676008	271.1856063
chr08	52600	1200	2.895616487	2166.875885
chr08	54600	2400	5.341145833	8155.8638
chr08	57700	1100	2.921396189	1986.245736
chr08	59300	200	1.041456288	288.270834
chr08	59800	200	1.156383267	321.058087
chr08	60200	200	1.084945489	269.3332219
chr08	60500	400	1.529121031	634.2081342
chr08	61000	200	1.619282821	327.7455538
chr08	63200	300	1.416118421	435.0100964
chr08	63700	300	1.244205647	417.7586323
chr08	65600	300	1.767040264	486.6786716
chr08	66000	200	1.292431193	252.8903718
chr08	66300	400	1.994506702	722.2053155
chr08	66800	500	1.504446388	657.9162175
chr08	68200	300	1.209603425	407.8866757
chr08	68600	500	2.083333333	721.3317275
chr08	69600	1400	3.962142039	3538.039107
chr08	72800	1200	2.402163225	1772.988856
chr08	74100	1600	5.509345794	5935.089939
chr08	75900	1700	6.36156215	6723.34876
chr08	78800	1400	2.714849624	2666.622573
chr08	81700	1200	2.917934144	2763.049209
chr08	84200	1100	2.491046761	1777.113843
chr08	85800	1300	4.396798761	4000.947787
chr08	96500	3800	19.69234884	33284.88076
chr08	102500	500	2.369090909	743.1934751
chr08	103300	1100	1.867279693	1635.123032
chr08	105200	1100	1.682715075	1621.132802
chr08	110300	200	1.449885584	359.5241209
chr08	110700	3100	5.129807692	9059.557098
chr08	116200	3100	3.493824014	6065.478618
chr08	120200	3100	7.843787966	13034.69893
chr08	124100	200	1.068068068	283.5440886
chr08	124400	500	2.657794677	857.6444953
chr08	125800	600	2.217687075	994.3967561
chr08	127900	200	1.199622642	268.00177
chr08	128500	300	1.17509713	396.8278446
chr08	129100	300	1.358983051	450.6674395
chr08	130200	500	1.713986014	775.0044604
chr08	131000	300	1.728183323	520.8075121
chr08	131600	1000	1.53215966	1435.842573
chr08	133200	1100	1.879545485	1774.453649
chr08	134400	1000	2.250050382	1792.695655
chr08	137600	2000	8.583626761	9021.374688
chr08	145200	200	1.214588634	279.5728321
chr08	145500	200	1.143154246	318.7659946
chr08	145900	600	1.288053837	796.2823616
chr08	147500	500	1.56468992	638.0111241
chr08	148200	400	2.073937897	727.8700527
chr08	149700	1600	5.321896082	5120.112914
chr08	151800	200	1.081212121	286.5846774
chr08	152100	800	2.936170213	1173.235372
chr08	156900	1100	4.446666667	3411.568631
chr08	160900	1100	3.030145989	2441.193636
chr08	162400	200	1.115339344	269.060311
chr08	162800	200	1.082647072	281.9096073
chr08	163200	200	1.404803123	340.8851952
chr08	163500	1900	3.750903602	4828.812457
chr08	168600	1200	2.995983447	2558.504879
chr08	170300	200	1.5269109	325.0572278
chr08	170700	500	1.345123142	714.1087263
chr08	171400	400	1.931957613	632.9394322
chr08	172100	500	1.42037037	604.8592713
chr08	173400	3600	6.812287518	11346.97414
chr08	177100	1000	3.575804001	2288.887378
chr08	179300	200	1.094562648	234.414785
chr08	181200	1200	2.835590551	2765.797201
chr08	184600	400	1.512237309	568.0249906
chr08	185100	500	1.399754288	698.1652363
chr08	185700	200	1.4526394	377.4250572
chr08	187800	1400	5.437098901	4852.769522
chr08	190100	200	1.114319157	260.1327619
chr08	194100	1400	2.989605995	2590.670232
chr08	198100	1100	3.575781877	2393.448121
chr08	199400	500	1.703412073	800.8245979
chr08	200100	600	1.467226891	734.762608
chr08	200800	200	1.05424322	318.7238426
chr08	201100	400	1.159090909	523.674573
chr08	201900	200	1.138333166	288.9263029
chr08	202400	2100	7.376725838	7224.553928
chr08	205000	1000	2.212952489	1576.662876
chr08	217500	200	1.129130967	151.0261901
chr08	224800	200	1.361639555	333.8514377
chr08	227500	200	1.423611111	318.660571
chr08	232200	200	1.164705882	261.0419139
chr08	232500	500	2.00434345	801.1614589
chr08	240500	800	1.571157895	1093.278318
chr08	261900	1100	2.988901646	1955.877033
chr08	268100	200	1.1529754	277.8319423
chr08	268400	400	1.994501872	764.5835286
chr08	270400	400	1.289330922	488.8924417
chr08	271100	1200	1.634709121	1631.652226
chr08	279600	300	1.545929019	348.6460126
chr08	280000	300	1.198035843	381.9433189
chr08	290500	300	1.728571429	428.0165701
chr08	296000	400	1.350926849	494.2115151
chr08	301100	1500	5.873504274	5913.470314
chr08	304200	300	2.410141988	595.9791138
chr08	304600	1600	7.765909091	6360.904233
chr08	307300	6300	7.742196098	22839.72865
chr08	313700	400	1.963273196	525.0519551
chr08	315200	200	1.446803381	330.7792336
chr08	315500	1400	4.995192308	4278.764397
chr08	322400	600	1.593034351	816.9316935
chr08	330200	700	1.357211796	953.4811031
chr08	332400	600	1.574126329	830.3505286
chr08	333100	300	1.198128698	386.2241334
chr08	333800	900	4.093361612	2325.789385
chr08	335500	2900	4.62741957	8228.033579
chr08	345800	1600	2.640545721	3056.276788
chr08	347500	300	1.846075085	527.0854735
chr08	353800	1100	3.96099835	3328.514666
chr08	355300	200	1.088997148	250.5460452
chr08	355800	600	2.579879276	1204.258746
chr08	357100	200	1.325008216	276.9973889
chr08	357400	300	1.645052474	426.2561722
chr08	358600	500	2.159277322	930.8955625
chr08	360100	500	1.923359859	719.5222165
chr08	360700	1800	2.926696008	3511.567994
chr08	363000	1600	4.700854701	5116.00461
chr08	366200	2800	8.52870071	12882.61862
chr08	369100	600	1.54208247	730.7974371
chr08	369900	700	3.163819876	1480.590007
chr08	370900	200	1.117952763	268.7039791
chr08	371300	400	1.50460898	547.4508698
chr08	372100	400	1.143931192	441.706924
chr08	372600	1400	2.569579288	2546.69209
chr08	374100	1500	4.082325129	4617.812868
chr08	376000	1100	2.266968326	1701.370263
chr08	379300	500	1.152097902	592.2619374
chr08	379900	300	1.192248191	344.4253911
chr08	380300	1700	6.571652087	7213.3473
chr08	382100	200	1.182502641	209.8000207
chr08	382400	300	1.302726018	459.4765845
chr08	382800	300	1.122598837	418.8952398
chr08	383200	200	1.590768597	365.7120864
chr08	383500	200	1.052389078	258.7455368
chr08	383800	4600	4.939044587	11965.2698
chr08	390200	5200	5.94107222	14756.493
chr08	395500	4700	9.267814738	20181.52767
chr08	401300	4000	6.40737489	16845.94451
chr08	405500	1200	2.812430487	2695.553731
chr08	406800	1200	5.576515194	3916.458249
chr08	408200	300	1.087064677	383.9203877
chr08	409000	400	1.429467085	617.1681781
chr08	409500	700	2.177825399	1141.699349
chr08	410300	200	1.184176394	281.9840427
chr08	417000	200	1.123308271	21.58026646
chr08	417300	1000	2.356807512	1891.933577
chr08	418500	300	1.16581226	350.2753339
chr08	419400	200	4.108333333	475.4210666
chr08	419900	300	3.191176471	846.7451666
chr08	420300	700	1.920785597	1089.188601
chr08	421100	200	1.217450813	311.6409105
chr08	422000	1100	1.90733945	1818.277636
chr08	424000	200	1.618729097	363.2225846
chr08	424800	1100	2.419792252	1918.558789
chr08	430400	200	1.047955839	242.4142487
chr08	432600	1000	1.98072301	1698.2217
chr08	434300	1600	3.663587629	4034.473387
chr08	437400	1100	1.948092558	1661.834745
chr08	439500	300	1.464118515	411.1547326
chr08	444500	2000	2.683030303	3750.338087
chr08	447200	200	1.154311039	318.3016368
chr08	447500	700	1.63742386	1073.481723
chr08	449000	200	1.073170732	262.7767787
chr08	449400	900	3	1751.786428
chr08	450400	400	2.153110048	700.3323809
chr08	451100	200	1.032673861	298.6860625
chr08	453200	200	1.080645161	233.9685171
chr08	454400	3900	7.471516037	12163.31767
chr08	458500	300	1.128409884	393.5784183
chr08	458900	900	1.330753564	1174.048976
chr08	463500	800	2.787654419	1631.126118
chr08	464400	1500	3.101570566	3305.390615
chr08	466000	2700	5.459770115	8340.489818
chr08	470200	1000	2.064840331	1686.663912
chr08	471300	500	2.257647908	948.6814354
chr08	472800	1100	2.296056802	1917.941666
chr08	474500	200	1.32755418	272.0043622
chr08	475700	900	1.7115727	1298.503808
chr08	477100	400	1.175965131	542.7785821
chr08	477600	300	1.224667053	402.3113758
chr08	478100	1800	3.626456876	4081.797536
chr08	480800	2100	8.693075133	10053.84962
chr08	483600	1200	3.074100212	2319.140896
chr08	484900	3100	7.194	13557.9201
chr08	488600	700	1.733333333	1120.736419
chr08	489700	3300	6.604449472	12024.19279
chr08	494000	200	1.397588787	272.1033533
chr08	494300	800	4.002616089	1917.506106
chr08	495200	300	2.060469765	408.8369558
chr08	496400	600	1.59559625	751.1120497
chr08	497300	500	1.55015873	695.4276694
chr08	497900	200	1.255612679	343.0604638
chr08	498600	300	1.616352486	478.6976376
chr08	499100	300	1.439126166	427.8389605
chr08	500500	900	1.625152625	1253.053793
chr08	503500	1100	3.225031807	3146.741596
chr08	509100	900	4.186971519	2291.578897
chr08	510400	1200	3.889803428	3107.341969
chr08	513000	1100	2.449989152	1811.476811
chr08	514300	200	1.321611733	330.7706063
chr08	514700	2200	6.988411725	8216.775181
chr08	518000	200	1.175925926	319.0085102
chr08	518400	700	2.13037448	929.1218537
chr08	520000	200	1.491737892	302.7015109
chr08	520300	200	1.713203463	366.8429526
chr08	520600	800	1.929888268	1542.700981
chr08	522600	200	1.070314005	254.0625295
chr08	522900	200	1.406902728	341.0098793
chr08	523300	600	2.301264431	1092.121754
chr08	524200	300	1.288014723	404.5984053
chr08	524600	900	3.45078125	2296.639362
chr08	525900	1200	6.258862339	5501.994255
chr08	529800	1200	2.898751734	2016.100642
chr08	533100	1900	6.070005967	6654.531443
chr08	537900	900	2.203653307	1524.256387
chr08	541600	300	1.168884945	401.0875508
chr08	546800	1300	1.649196957	1516.275561
chr08	548300	300	1.509859626	384.7953305
chr08	549000	400	1.879010567	670.3815599
chr08	549500	700	2.517218096	1399.011116
chr08	550400	200	1.217181329	321.3127446
chr08	553700	1600	5.381714137	5899.377643
chr08	556400	200	4.520833333	139.1850874
chr08	559500	8500	24.77355372	76743.52296
chr08	579900	2800	9.37568192	13112.37628
chr08	589100	200	1.575892857	361.5417748
chr08	595600	2800	7.630596309	12165.30667
chr08	598900	2800	24.98467261	31750.62546
chr08	602600	1900	7.875	3673.013939
chr09	300	400	0.666666667	47.00854701
chr09	800	1600	4.564953372	4854.959737
chr09	7700	9200	17.17857143	29736.28184
chr09	17100	700	24.55059524	10983.84162
chr09	19800	3300	8.634408602	14199.29734
chr09	24000	3100	9.749186483	14622.40529
chr09	27200	300	2.987637363	381.9108899
chr09	29200	500	9.281290937	2669.362821
chr09	29800	1200	9.623979735	4870.358413
chr09	32200	1900	2.357142857	1500.265568
chr09	35300	1100	9.462200957	5734.45036
chr09	36800	1100	3.420708955	251.2352053
chr09	38000	200	1.870887765	303.243093
chr09	40500	200	4.525862069	656.0052694
chr09	42100	2700	8.853190223	9037.712569
chr09	47000	200	0.266520906	-80.91696769
chr09	50600	200	0.37335443	10.40355617
chr09	50900	800	0.99984242	62.43028715
chr09	53200	2300	24.5837578	22861.28643
chr09	57700	7400	4.564919506	10653.14954
chr09	65600	500	1.79417122	-36.13749979
chr09	67400	1400	1.742874469	1460.412353
chr09	70000	600	0.185017597	-21.44842871
chr09	70700	300	0.531100478	-213.2242361
chr09	71900	1700	1.072856222	1125.626503
chr09	74300	200	0.059090909	-155.8882433
chr09	74600	1200	0.668467869	408.3414535
chr09	78000	400	0.133971292	-85.59616951
chr09	78500	3900	1.523049128	2849.958771
chr09	83800	1900	1.441014656	1316.705147
chr09	85800	2600	2.80619765	4315.211729
chr09	88600	300	0.191113235	33.61506532
chr09	90500	1900	1.615373037	1912.482372
chr09	93300	4000	3.202960625	8343.227714
chr09	98000	1600	2.526445771	1958.327784
chr09	101500	200	0.182540277	12.6060471
chr09	101800	4300	1.925313059	3949.253681
chr09	107100	1200	1.354853129	823.4076966
chr09	108900	1200	2.521177388	1118.985321
chr09	110200	1000	2.742269375	1721.422362
chr09	112400	200	0.184289068	1.244760544
[truncated: 2,530 more rows]
